# Supplementary material for: Identification of flubendazole as potential anti-neuroblastoma compound in a large cell line screen
Source: PubMed Central journal article supplement (PMC4314641; doi:10.1038/srep08202), 2015-02-03
Supplement: srep08202-s1.pdf [file srep08202-s1.pdf]

**Supplementary files to:**

**Identification of flubendazole as potential anti-neuroblastoma compound in a large cell line screen**

Martin Michaelis, Bishr Agha, Florian Rothweiler, Nadine Löschmann, Yvonne Voges, Michel Mittelbronn, Tatjana Starzetz, Patrick N. Harter, Behnaz A. Abhari, Simone Fulda, Frank Westermann, Kristoffer Riecken, Silvia Spek, Klaus Langer, Michael Wiese, Wilhelm G. Dirks, Richard Zehner, Jaroslav Cinatl, Mark Wass, Jindrich Cinatl jr.

# Suppl. Figure S1

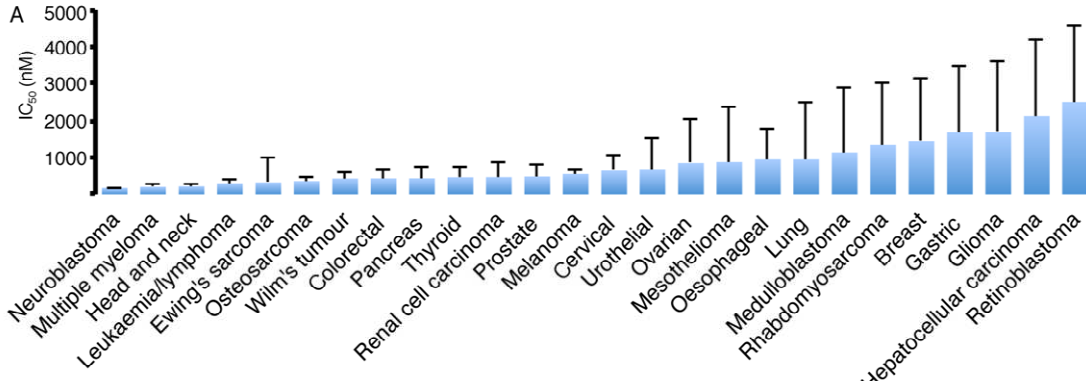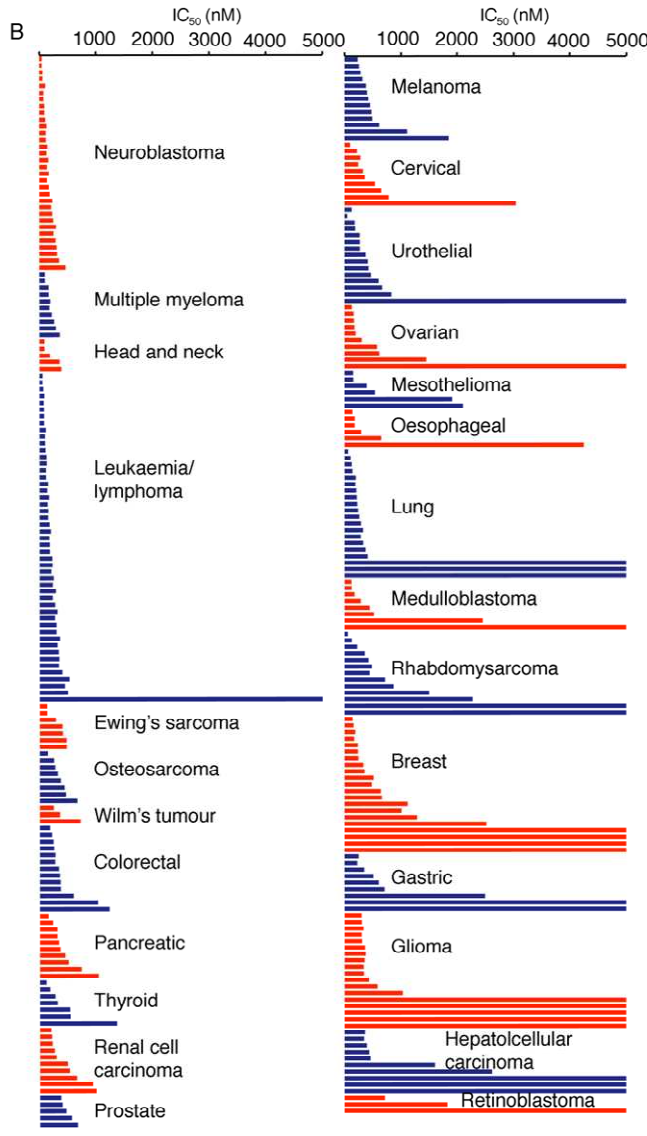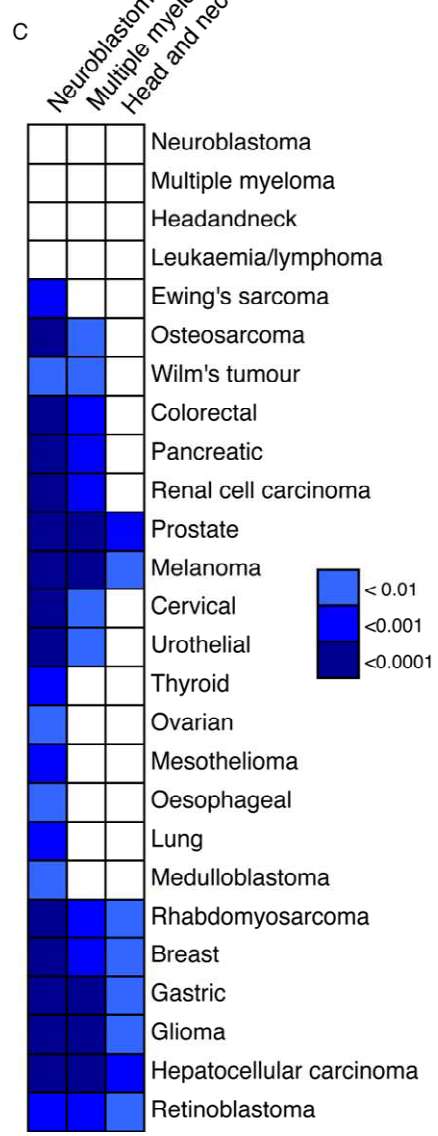

**Suppl. Figure S1.** Effects of flubendazole in a panel of cancer cell lines from different entities. The flubendazole concentrations that decreased cancer cell viability by 50% ( $IC_{50}$ ) were determined by MTT assay after 5 days of incubation (flubendazole 5 $\mu$ M was the maximum concentration tested). A) The average  $IC_{90}$  values for each cancer entity are presented. Error bars represent a single standard deviation B) The average  $IC_{50}$  for each cell line (average from 2 experiments per cell line) is presented. Cancer entities are ordered by increasing overall average as shown in A. C) The Wilcoxon rank sum test indicated significant differences ( $p < 0.05$ ) between  $IC_{50}$ s for the different cancer entities. Cells are coloured according to their significance level after multiple testing correction applying the Benjamini-Hochberg method. The detailed data is shown in Suppl. Table S1.

# Suppl. Figure S2

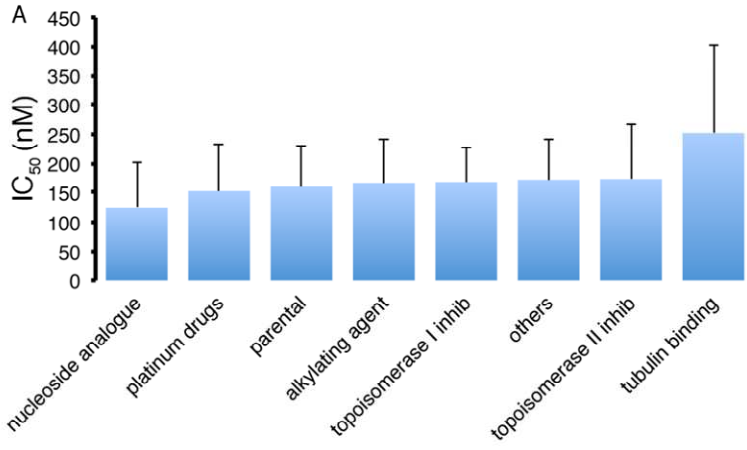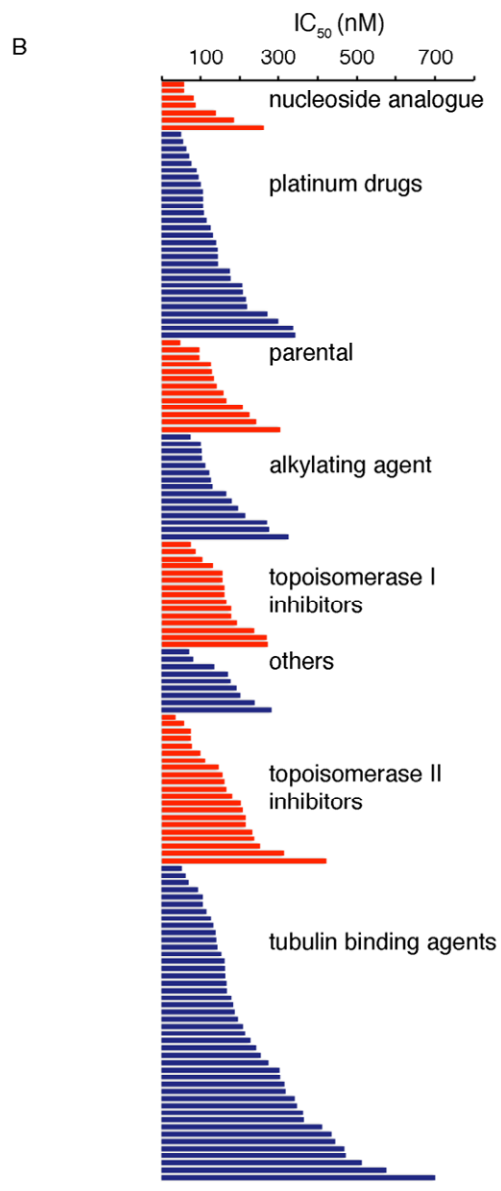

**Suppl. Figure S2.** Effects of flubendazole in a panel of parental neuroblastoma cell lines and their sub-lines adapted to anti-cancer drugs. The flubendazole concentrations that decreased cancer cell viability by 50% ( $IC_{50}$ ) were determined by MTT assay after 5 days of incubation (flubendazole 5 $\mu$ M was the maximum concentration tested). A) The average  $IC_{50}$  values for each cancer entity are presented. Error bars represent a single standard deviation. B) The average  $IC_{50}$  for each cell line (average from 2 experiments per cell line) is presented. The Wilcoxon rank sum test to test did not indicate a significant difference ( $p < 0.05$ ) between  $IC_{50}$ s for the cell lines with acquired resistance to different drug classes. The detailed data is presented in Suppl Table S2.

Suppl. Figure S3

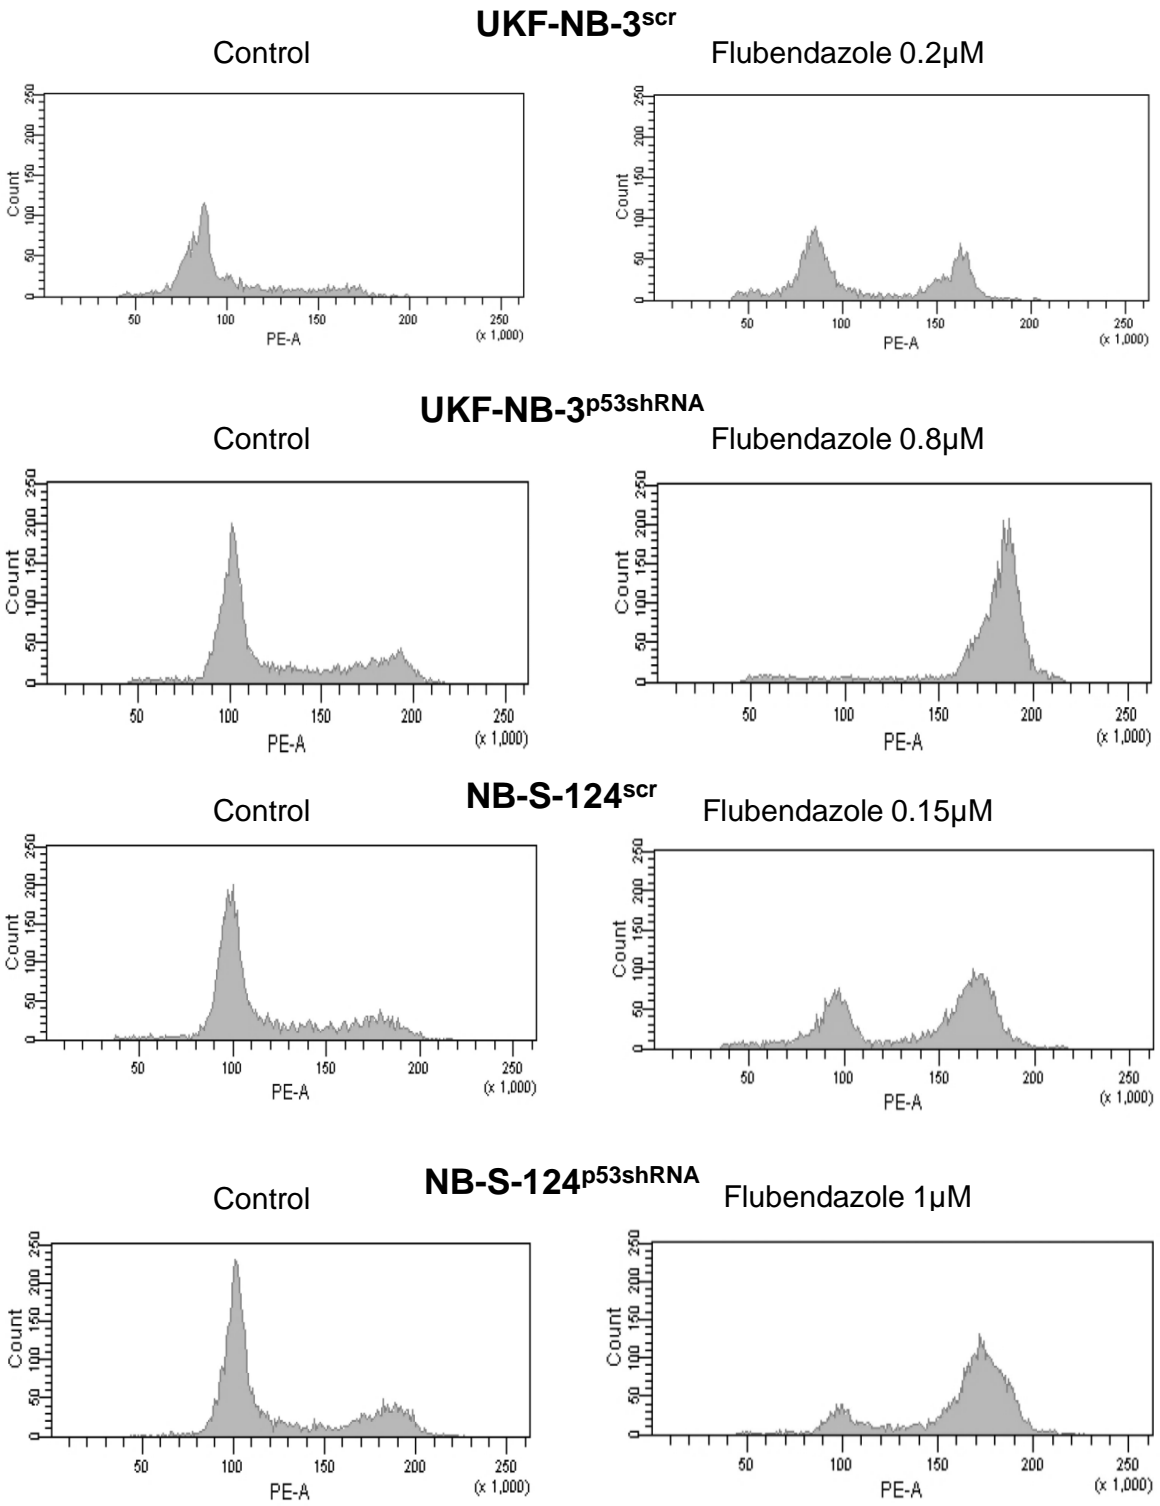

**Suppl. Figure S3.** Effects of flubendazole on cell cycle distribution in neuroblastoma cells transduced with lentiviral vectors encoding for scrambled, non-targeting shRNA (scr) or shRNA directed against p53 (p53shRNA). Cells were incubated with a flubendazole concentration two times higher than the flubendazole IC<sub>50</sub> value in the respective cell line for 24h.

**Suppl. Figure S4**

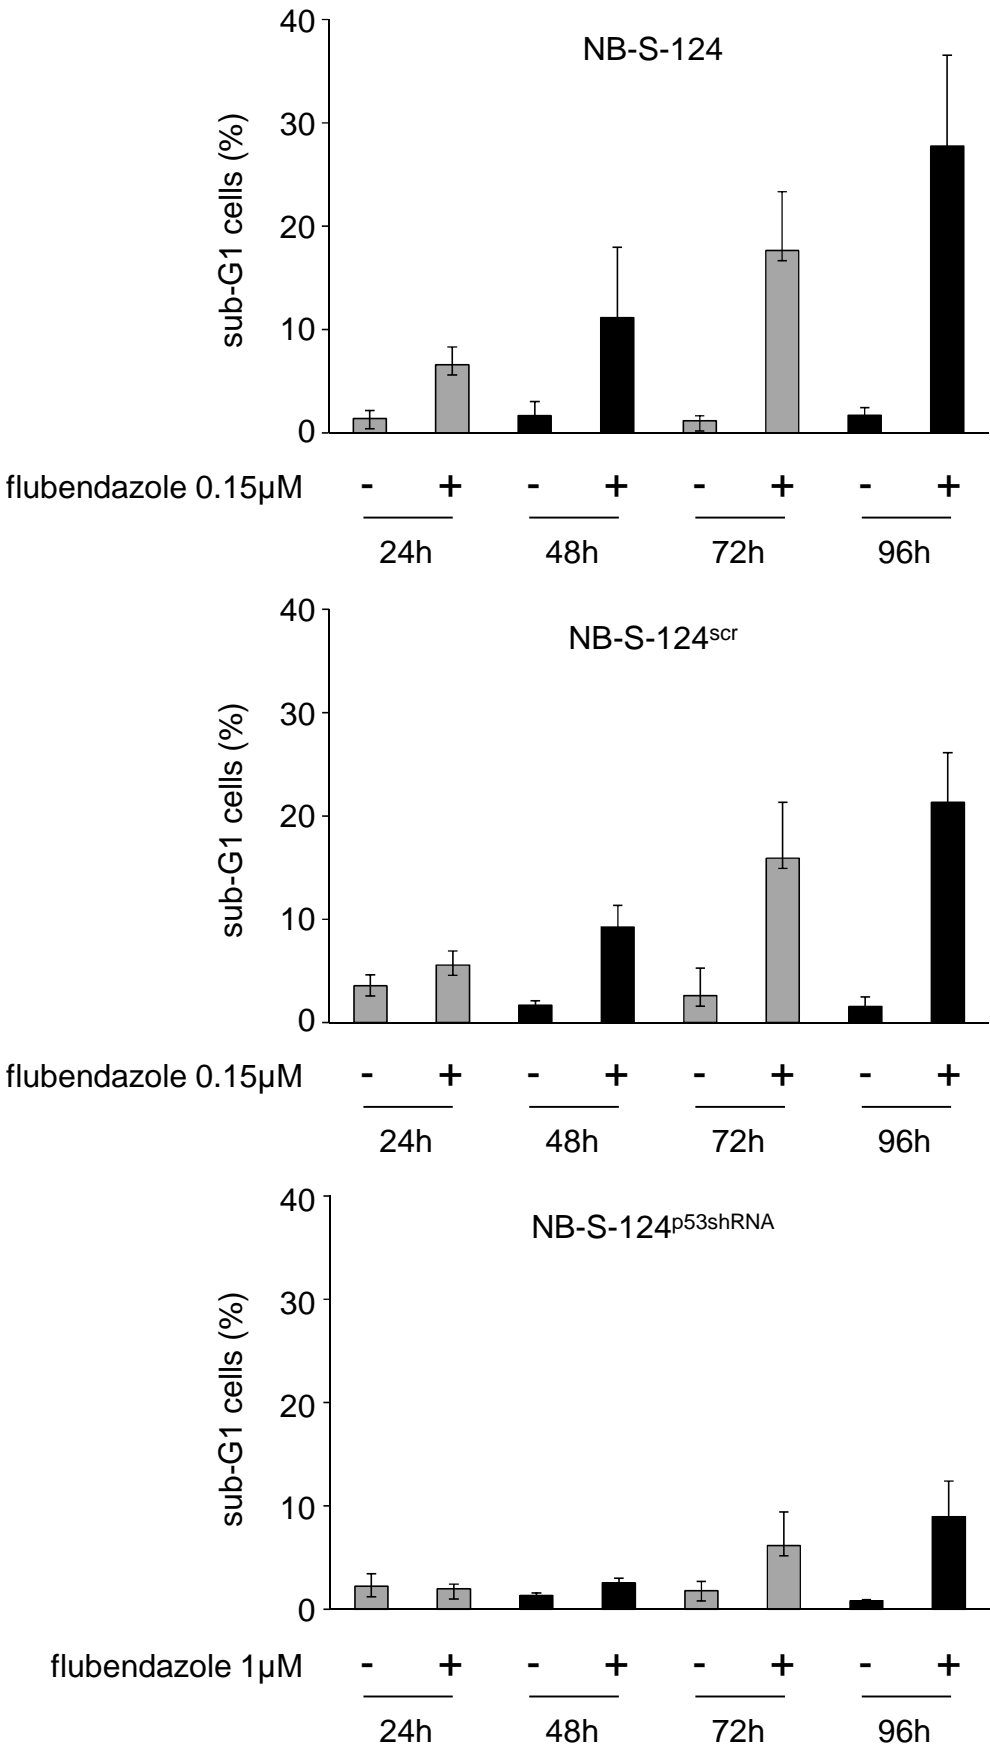



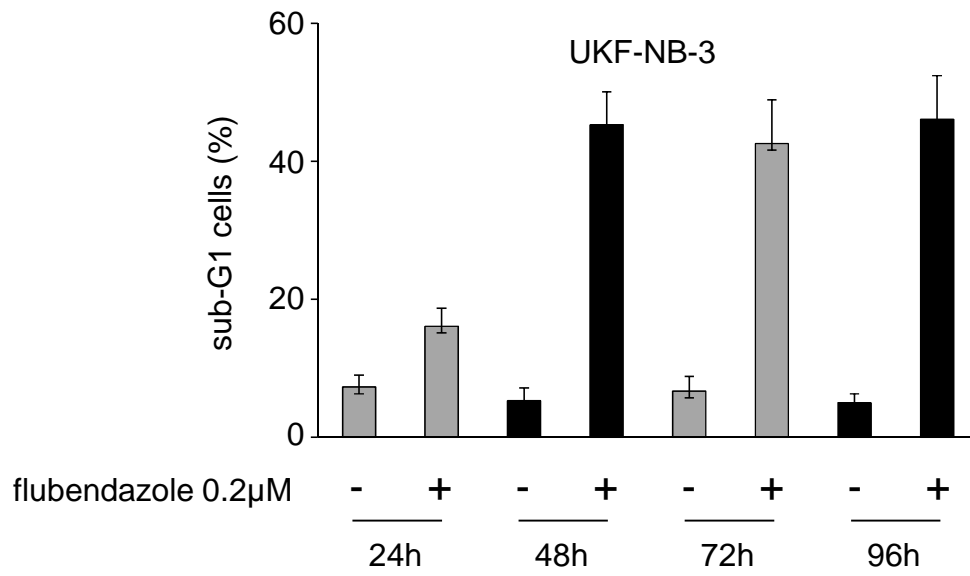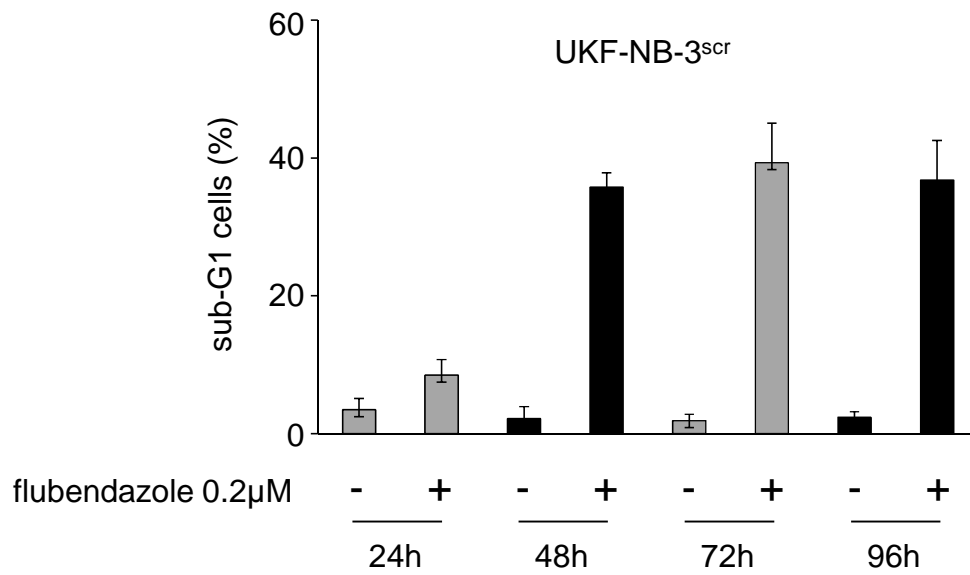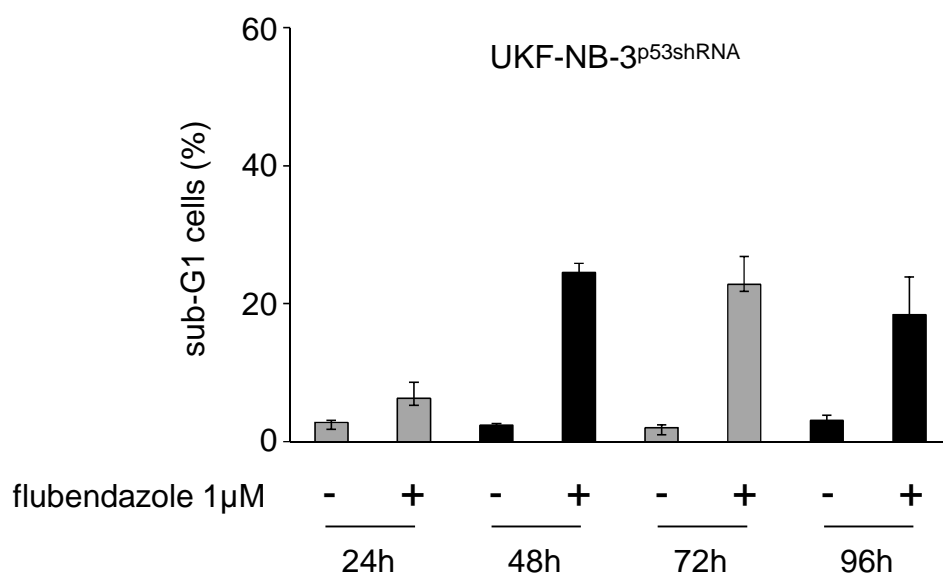

**Suppl. Figure S4.** Effects of flubendazole on the fraction of sub-G1 cells in p53 wild-type neuroblastoma cells in which p53 was depleted using a lentiviral vector encoding for shRNA directed against p53 (p53shRNA), and neuroblastoma cells transduced with a control vector expressing scrambled, non-targeting shRNA (scr). Flubendazole was used at a concentration two times higher than the flubendazole IC<sub>50</sub> value in the respective cell lines.

**Suppl. Figure S5**

**A**

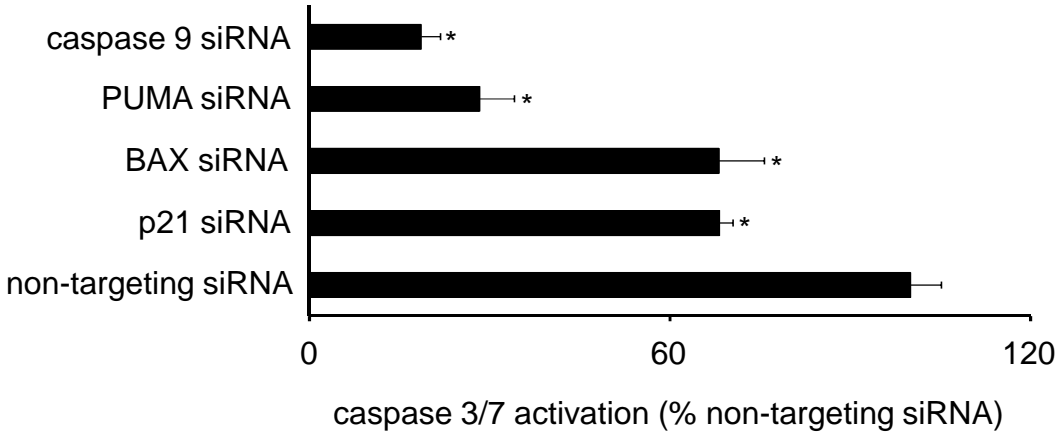

**B**

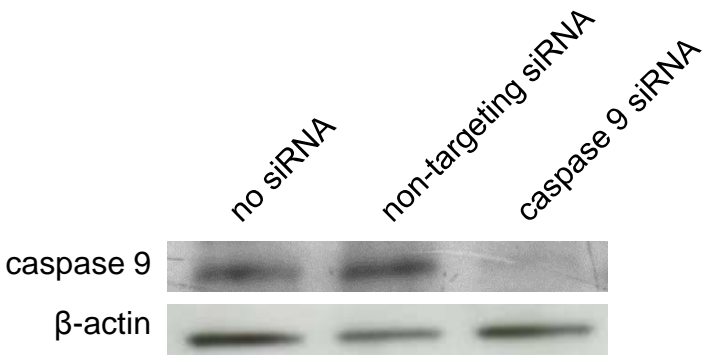

**C**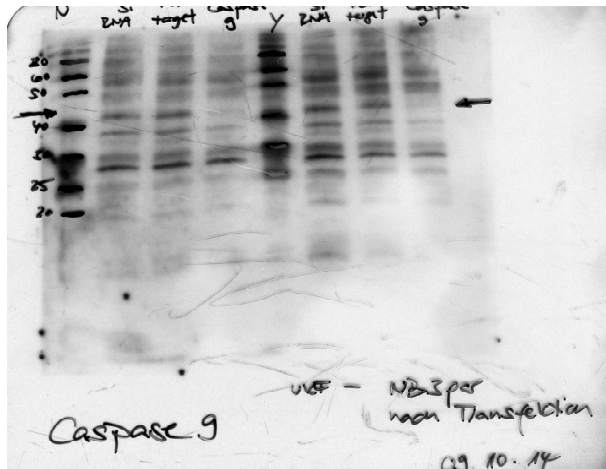**D**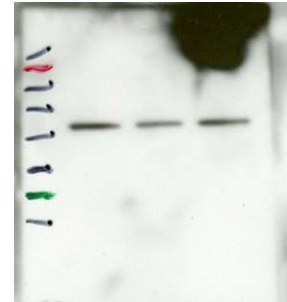

**Suppl. Figure S5.** A) Effects of siRNA directed against the p53 targets p21, BAX, or PUMA or caspase 9 on caspase 3/7 activation in UKF-NB-3 cells determined after 24h of flubendazole (150nM) treatment. \*  $P < 0.05$  relative to non-targeting control siRNA; B) Western blot indicating effects of non-targeting siRNA and siRNA directed against caspase 9 on caspase 9 protein levels in UKF-NB-3 cells (effects of siRNA directed against p21, BAX, and PUMA on the respective protein levels are presented in Figure 4); C) original Western blot indicating siRNA-mediated caspase 9 depletion; arrows indicate the caspase 9 bands. Columns from the left to the right: markers indicating protein size, no siRNA, non-targeting siRNA, caspase 9 siRNA, markers indicating protein size, no siRNA, non-targeting siRNA, caspase 9 siRNA; D) original  $\beta$ -actin Western blot serving as loading control; columns from the left to the right: no siRNA, non-targeting siRNA, caspase 9 siRNA

# Suppl. Figure S6

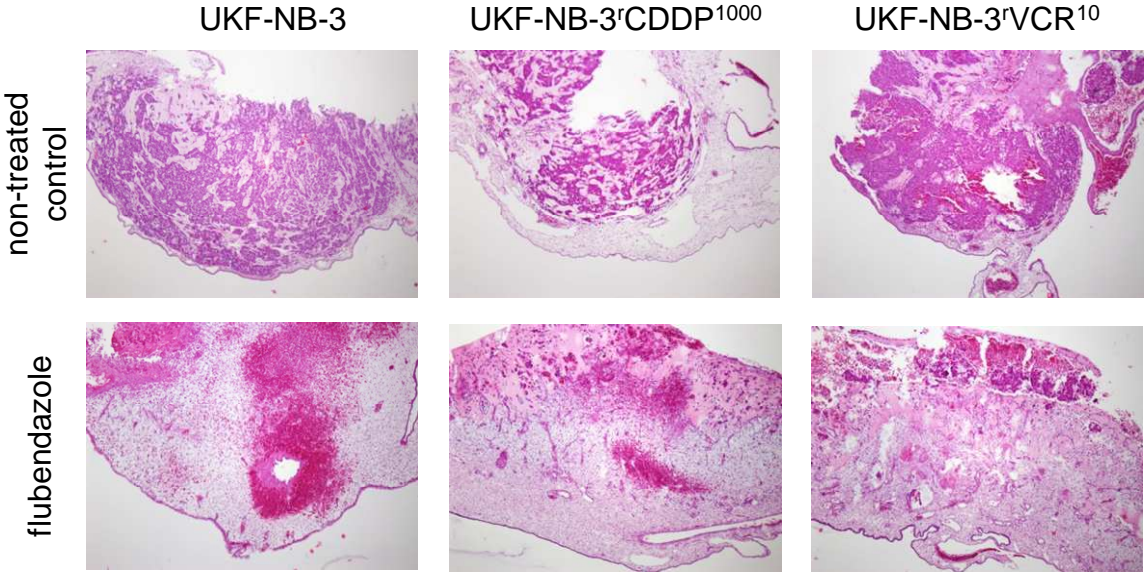

**Suppl. Figure S6.** Haematoxylin/eosin staining of representative CAMs demonstrating the effects of flubendazole (2µg, applied as (2-hydroxypropyl)-β-cyclodextrin complex in 100µL 0.9% NaCl solution) (original magnification: 4-fold). Flubendazole-treated tumours grow in a less extensive manner and present with large necrotic areas.

# Suppl. Figure S7

Original Western blots corresponding to Figure 4A, 4B, and 4C

## Figure 4A

p53

Bands from the left to the right

- 1: UKF-NB-3<sup>p53shRNA</sup> Nutlin-3 10 $\mu$ M
- 2: UKF-NB-3<sup>p53shRNA</sup> non-treated control
- 3: UKF-NB-3<sup>p53shRNA</sup> flubendazole 0.3 $\mu$ M
- 4: UKF-NB-3<sup>p53shRNA</sup> flubendazole 1.25 $\mu$ M
- 5: UKF-NB-3<sup>scr</sup> Nutlin-3 10 $\mu$ M
- 6: UKF-NB-3<sup>scr</sup> non-treated control
- 7: UKF-NB-3<sup>scr</sup> flubendazole 0.3 $\mu$ M
- 8: UKF-NB-3<sup>scr</sup> flubendazole 1.25 $\mu$ M

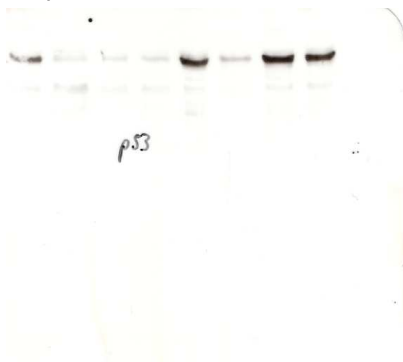

## Figure 4A

p53

Bands from the left to the right

- 1: N/A
- 2: N/A
- 3: N/A
- 4: N/A
- 5: UKF-NB-3 non-treated control
- 6: UKF-NB-3 flubendazole 0.3 $\mu$ M
- 7: UKF-NB-3 flubendazole 1.25 $\mu$ M
- 8: UKF-NB-3 Nutlin-3 10 $\mu$ M

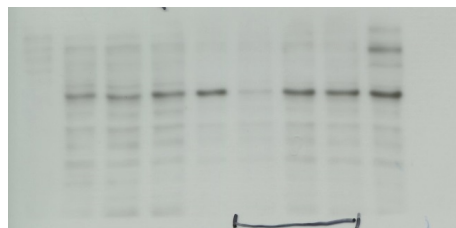

## Figure 4A

pp53

Bands from the left to the right

- 1: UKF-NB-3 non-treated control
- 2: UKF-NB-3 flubendazole 0.3 $\mu$ M
- 3: UKF-NB-3 nutlin-3
- 4: N/A
- 5: N/A
- 6: N/A
- 7: N/A
- 8: N/A

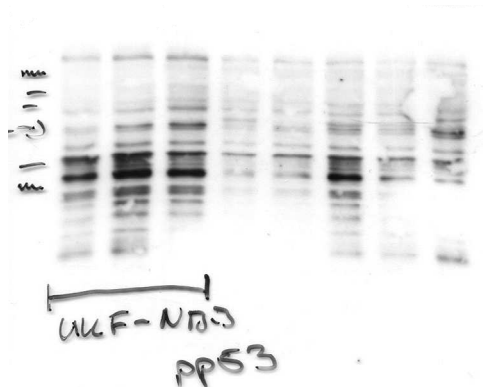

## Figure 4A

pp53

Bands from the left to the right

- 1: UKF-NB-3<sup>scr</sup> non-treated control
- 2: UKF-NB-3<sup>scr</sup> flubendazole 0.08 $\mu$ M
- 3: UKF-NB-3<sup>scr</sup> non-treated control
- 4: UKF-NB-3<sup>scr</sup> flubendazole 0.3 $\mu$ M
- 5: UKF-NB-3<sup>p53shRNA</sup> non-treated control
- 6: UKF-NB-3<sup>p53shRNA</sup> flubendazole 0.08 $\mu$ M
- 7: UKF-NB-3<sup>p53shRNA</sup> non-treated control
- 8: UKF-NB-3<sup>p53shRNA</sup> flubendazole 0.3 $\mu$ M

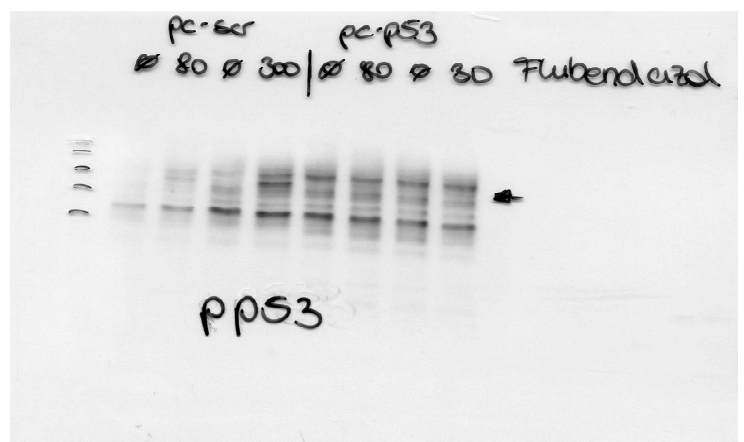

### Figure 4A

p21

Bands from the left to the right

- |                                 |                           |
|---------------------------------|---------------------------|
| 1: UKF-NB-3 <sup>p53shRNA</sup> | Nutlin-3 10 $\mu$ M       |
| 2: UKF-NB-3 <sup>p53shRNA</sup> | non-treated control       |
| 3: UKF-NB-3 <sup>p53shRNA</sup> | flubendazole 0.3 $\mu$ M  |
| 4: UKF-NB-3 <sup>p53shRNA</sup> | flubendazole 1.25 $\mu$ M |
| 5: UKF-NB-3 <sup>scr</sup>      | Nutlin-3 10 $\mu$ M       |
| 6: UKF-NB-3 <sup>scr</sup>      | non-treated control       |
| 7: UKF-NB-3 <sup>scr</sup>      | flubendazole 0.3 $\mu$ M  |
| 8: UKF-NB-3 <sup>scr</sup>      | flubendazole 1.25 $\mu$ M |

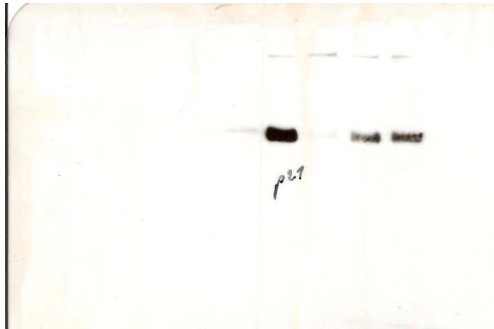

### Figure 4A

p21

Bands from the left to the right

- |             |                           |
|-------------|---------------------------|
| 1: UKF-NB-3 | Nutlin-3 10 $\mu$ M       |
| 2: UKF-NB-3 | non-treated control       |
| 3: UKF-NB-3 | flubendazole 0.3 $\mu$ M  |
| 4: UKF-NB-3 | flubendazole 1.25 $\mu$ M |
| 5: N/A      |                           |
| 6: N/A      |                           |
| 7: N/A      |                           |
| 8: N/A      |                           |

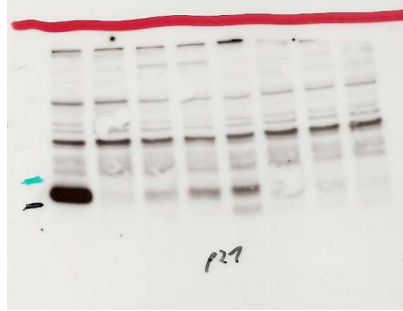

### Figure 4A

BAX

- N/A
- N/A
- UKF-NB-3 non-treated control
- UKF-NB-3 0.3 $\mu$ M flubendazole
- N/A
- N/A
- N/A

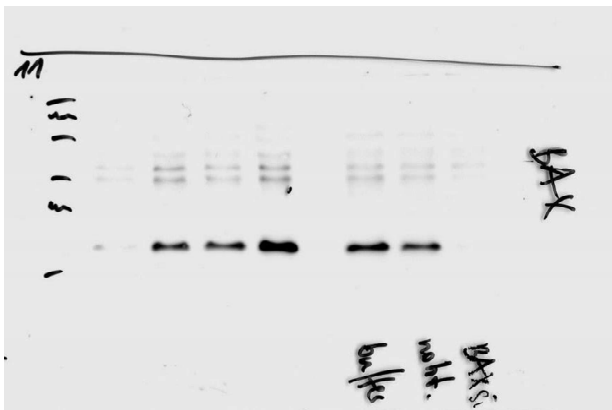

### Figure 4A

Bax

Bands from the left to the right

- |                                 |                           |
|---------------------------------|---------------------------|
| 1: UKF-NB-3 <sup>p53shRNA</sup> | Nutlin-3 10 $\mu$ M       |
| 2: UKF-NB-3 <sup>p53shRNA</sup> | non-treated control       |
| 3: UKF-NB-3 <sup>p53shRNA</sup> | flubendazole 0.3 $\mu$ M  |
| 4: UKF-NB-3 <sup>p53shRNA</sup> | flubendazole 1.25 $\mu$ M |
| 5: UKF-NB-3 <sup>scr</sup>      | Nutlin-3 10 $\mu$ M       |
| 6: UKF-NB-3 <sup>scr</sup>      | non-treated control       |
| 7: UKF-NB-3 <sup>scr</sup>      | flubendazole 0.3 $\mu$ M  |
| 8: UKF-NB-3 <sup>scr</sup>      | flubendazole 1.25 $\mu$ M |

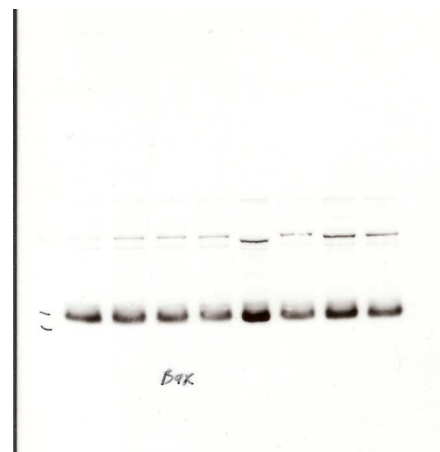

## Figure 4A

### PUMA

Bands from the left to the right

- 1: N/A
- 2: N/A
- 3: N/A
- 4: N/A
- 5: UKF-NB-3 non-treated control
- 6: UKF-NB-3 flubendazole 0.3 $\mu$ M
- 7: N/A
- 8: N/A

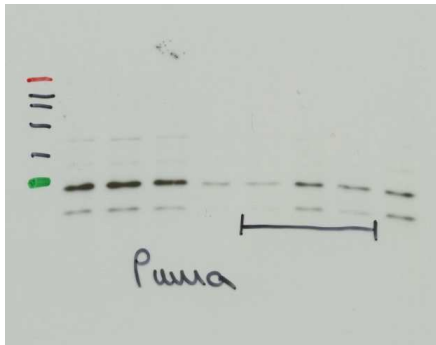

## Figure 4A

### PUMA

Bands from the left to the right

- 1: UKF-NB-3<sup>p53shRNA</sup> Nutlin-3 10 $\mu$ M
- 2: UKF-NB-3<sup>p53shRNA</sup> non-treated control
- 3: UKF-NB-3<sup>p53shRNA</sup> flubendazole 0.3 $\mu$ M
- 4: UKF-NB-3<sup>p53shRNA</sup> flubendazole 1.25 $\mu$ M
- 5: UKF-NB-3<sup>scr</sup> Nutlin-3 10 $\mu$ M
- 6: UKF-NB-3<sup>scr</sup> non-treated control
- 7: UKF-NB-3<sup>scr</sup> flubendazole 0.3 $\mu$ M
- 8: UKF-NB-3<sup>scr</sup> flubendazole 1.25 $\mu$ M

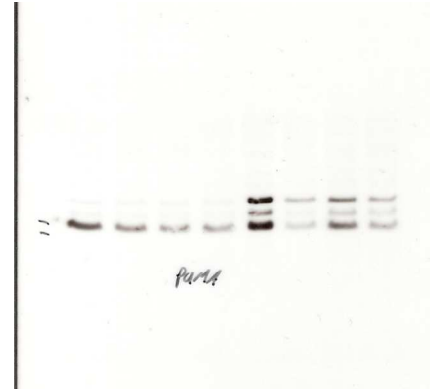

## Figure 4B

### Caspase 3

Bands from the left to the right

- 1: N/A
- 2: N/A
- 3: UKF-NB-3<sup>scr</sup> non-treated control
- 4: UKF-NB-3<sup>scr</sup> flubendazole 0.3 $\mu$ M
- 5: UKF-NB-3<sup>p53shRNA</sup> non-treated control
- 6: UKF-NB-3<sup>p53shRNA</sup> flubendazole 0.3 $\mu$ M
- 7: N/A
- 8: N/A

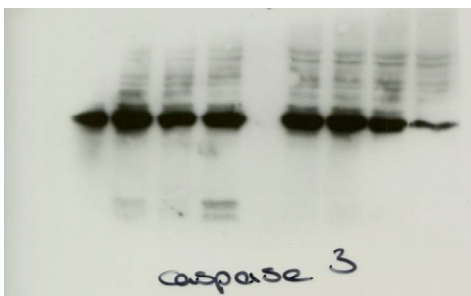

## Figure 4B

### Caspase 3

Bands from the left to the right

- 1: UKF-NB-3 non-treated
- 2: UKF-NB-3 flubendazole 0.3 $\mu$ M
- 3: N/A
- 4: N/A
- 5: N/A
- 6: N/A

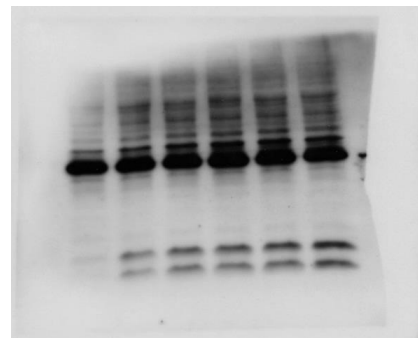



## Figure 4B

### PARP

Bands from the left to the right

- |                                 |                           |
|---------------------------------|---------------------------|
| 1: UKF-NB-3 <sup>p53shRNA</sup> | Nutlin-3 10 $\mu$ M       |
| 2: UKF-NB-3 <sup>p53shRNA</sup> | non-treated control       |
| 3: UKF-NB-3 <sup>p53shRNA</sup> | flubendazole 0.3 $\mu$ M  |
| 4: UKF-NB-3 <sup>p53shRNA</sup> | flubendazole 1.25 $\mu$ M |
| 5: UKF-NB-3 <sup>scr</sup>      | Nutlin-3 10 $\mu$ M       |
| 6: UKF-NB-3 <sup>scr</sup>      | non-treated control       |
| 7: UKF-NB-3 <sup>scr</sup>      | flubendazole 0.3 $\mu$ M  |
| 8: UKF-NB-3 <sup>scr</sup>      | flubendazole 1.25 $\mu$ M |

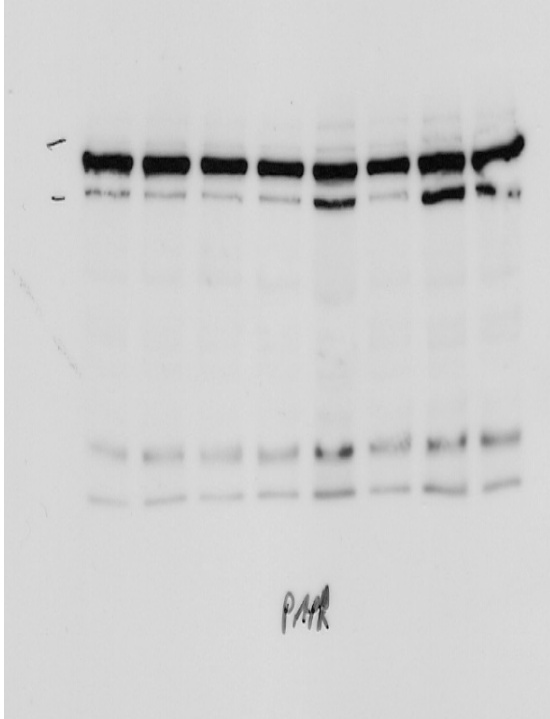

## Figure 4B

### PARP

Bands from the left to the right

- |             |                           |
|-------------|---------------------------|
| 1: UKF-NB-3 | Nutlin-3 10 $\mu$ M       |
| 2: UKF-NB-3 | non-treated control       |
| 3: UKF-NB-3 | flubendazole 0.3 $\mu$ M  |
| 4: UKF-NB-3 | flubendazole 1.25 $\mu$ M |
| 5: N/A      |                           |
| 6: N/A      |                           |
| 7: N/A      |                           |
| 8: N/A      |                           |

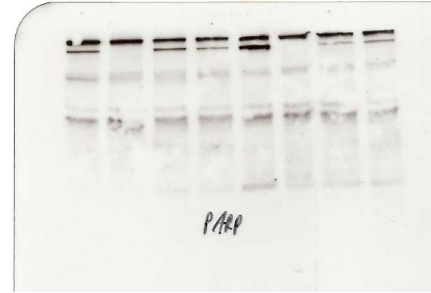

## Figure 4B

### $\beta$ -actin

Bands from the left to the right

- |                                 |                           |
|---------------------------------|---------------------------|
| 1: UKF-NB-3 <sup>p53shRNA</sup> | Nutlin-3 10 $\mu$ M       |
| 2: UKF-NB-3 <sup>p53shRNA</sup> | non-treated control       |
| 3: UKF-NB-3 <sup>p53shRNA</sup> | flubendazole 0.3 $\mu$ M  |
| 4: UKF-NB-3 <sup>p53shRNA</sup> | flubendazole 1.25 $\mu$ M |
| 5: UKF-NB-3 <sup>scr</sup>      | Nutlin-3 10 $\mu$ M       |
| 6: UKF-NB-3 <sup>scr</sup>      | non-treated control       |
| 7: UKF-NB-3 <sup>scr</sup>      | flubendazole 0.3 $\mu$ M  |
| 8: UKF-NB-3 <sup>scr</sup>      | flubendazole 1.25 $\mu$ M |

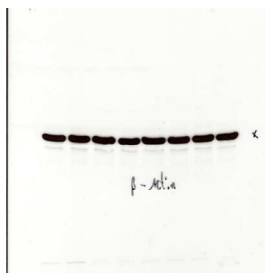

## Figure 4B

### $\beta$ -actin

Bands from the left to the right

- |             |                           |
|-------------|---------------------------|
| 1: N/A      |                           |
| 2: N/A      |                           |
| 3: N/A      |                           |
| 4: N/A      |                           |
| 5: UKF-NB-3 | Nutlin-3 10 $\mu$ M       |
| 6: UKF-NB-3 | non-treated control       |
| 7: UKF-NB-3 | flubendazole 0.3 $\mu$ M  |
| 8: UKF-NB-3 | flubendazole 1.25 $\mu$ M |

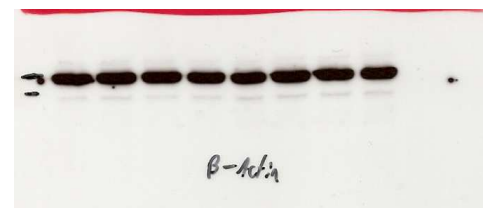

### Figure 4C

p21

from the left to the right:

- no siRNA
- non-targeting siRNA
- p21 siRNA

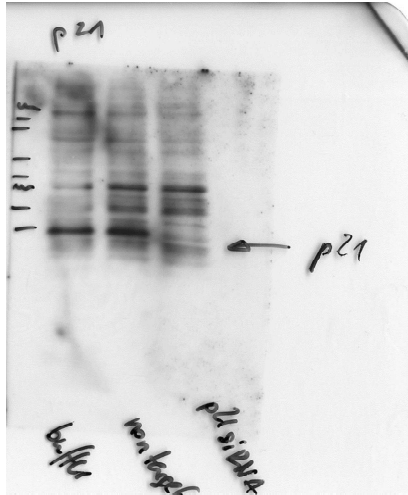

### Figure 4C

BAX

- N/A
- N/A
- N/A
- N/A
- no siRNA
- non-targeting siRNA
- BAX siRNA

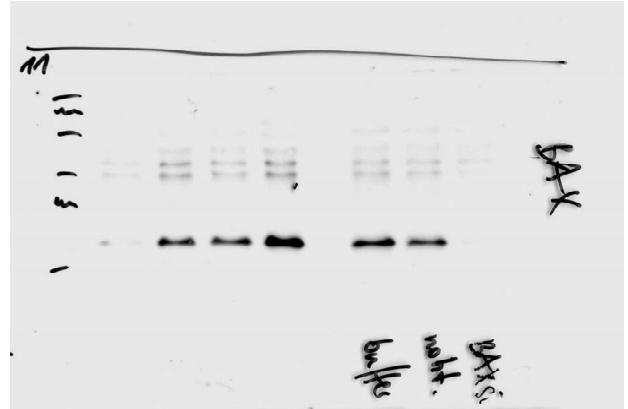

### Figure 4C

PUMA

from the left to the right:

- no siRNA
- non-targeting siRNA
- PUMA siRNA

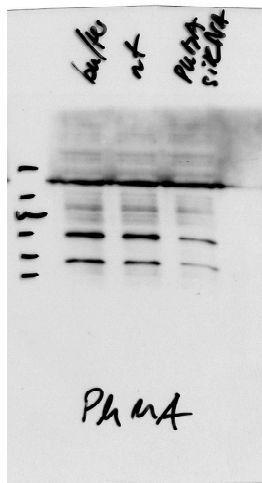

# Figure 4C

## $\beta$ -actin

from the left to the right:

*p21*

- no siRNA
- non-targeting siRNA
- *p21* siRNA

*BAX*

- no siRNA
- non-targeting siRNA
- *BAX* siRNA

*PUMA*

- no siRNA
- non-targeting siRNA
- *PUMA* siRNA

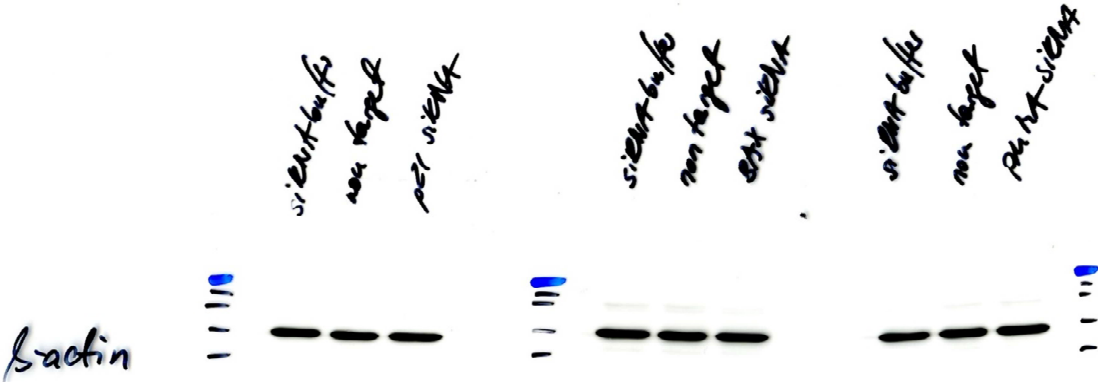

**Suppl. Table S1.** Flubendazole concentrations that inhibit the viability of the investigated cell lines by 50% (IC<sub>50</sub>) or 90% (IC<sub>90</sub>) as indicated by MTT assay after a five day incubation period.

| Cell line            | source/ medium                                              | IC <sub>50</sub> /IC <sub>90</sub> (nM)<br>flubendazole |
|----------------------|-------------------------------------------------------------|---------------------------------------------------------|
| <b>Breast cancer</b> |                                                             |                                                         |
| BT20                 | ATCC <sup>1</sup> /MEM <sup>2</sup>                         | 1287 ± 100 / > 5000                                     |
| B-474                | DSMZ/RPMI 1640 +<br>insulin                                 | 2519 ± 493 / > 5000                                     |
| BT-549               | CLS/DMEM                                                    | 168.9 ± 5.6 / 1016 ± 31                                 |
| CAL-51               | DMSZ/ DMEM                                                  | 1010 ± 125 / > 5000                                     |
| CAL-148              | DSMZ/ DMEM                                                  | 190.2 ± 27.6 / 355.4 ± 40.9                             |
| DU-4475              | DSMZ/ RPMI 1640                                             | 141.6 ± 18.4 / 296.3 ± 31.6                             |
| HCC38                | ATCC/RPMI 1640                                              | 234.6 ± 21.8 / > 5000                                   |
| HCC70                | ATCC/RPMI 1640                                              | > 5000 / > 5000                                         |
| HCC-1143             | DSMZ/ RPMI 1640                                             | > 5000 / > 5000                                         |
| HCC1806              | ATCC/ RPMI 1640                                             | 159.0 ± 4.6 / 603.4 ± 75.2                              |
| HCC1937              | ATCC/ RPMI 1640                                             | > 5,000 / > 5000                                        |
| HDQ-P1               | DSMZ/ DMEM                                                  | 1119 ± 105 / > 5000                                     |
| Hs 578T              | ECACC /DMEM                                                 | 243.8 ± 33.9 / 362.6 ± 46.8                             |
| MCF-7                | DSMZ/RPMI 1640 +<br>insulin                                 | > 5000 / > 5000                                         |
| MDA-MB-231           | CLS/ DMEM Ham's F12                                         | 513.6 ± 76.3 / > 5000                                   |
| MDA-MB-436           | CLS/ DMEM Ham's F12                                         | 660.0 ± 75.3 / > 5000                                   |
| MDA-MB-453           | DSMZ/Leibovitz's L15                                        | 237.7 ± 29.6 / > 5000                                   |
| MDA-MB-468           | ATCC/Leibovitz's L15                                        | 481.0 ± 72.5 / > 5000                                   |
| SK-BR-3              | ATCC/ IMDM                                                  | 354.2 ± 41.0 / > 5000                                   |
| SUM149PT             | Asterand/ DMEM Ham's<br>F12 + insulin and<br>hydrocortisone | 332.2 ± 29.2 / 500.2 ± 61.4                             |
| SUM159PT             | Asterand/ DMEM Ham's<br>F12 + insulin and<br>hydrocortisone | 642.4 ± 52.3 / 1518 ± 196                               |
| <b>Cervix cancer</b> |                                                             |                                                         |
| C-4 I                | ATCC/ Waymouth's MB<br>752/1                                | 280.8 ± 25.7 / > 5000                                   |
| CaSki                | CLS/ RPMI 1640                                              | 326.1 ± 40.6 / > 5000                                   |
| CERV-186             | CLS/ DMEM Ham's F12                                         | 219.7 ± 29.6 / 351.3 ± 39.7                             |
| CERV-196             | CLS/ DMEM Ham's F12                                         | 784.8 ± 95.2 / > 5000                                   |
| CERV-215             | CLS/ Ham's F12                                              | 538.5 ± 44.4 / > 5000                                   |
| HeLa                 | ATCC/MEM                                                    | 360.2 ± 33.5 / 1374 ± 101                               |
| ME-180               | JCRB/MEM                                                    | 650.5 ± 113.8 / 3128 ± 584                              |
| MS751                | ATCC/ MEM                                                   | 98.6 ± 12.5 / 301.8 ± 35.1                              |

|                          |                      |                             |
|--------------------------|----------------------|-----------------------------|
| SISO                     | DSMZ/ RPMI 1640      | 243.6 ± 29.3 / 825.4 ± 99.4 |
| SKG-IIIa                 | JCRB/Ham's F12       | 3042 ± 594 / > 5000         |
| <b>Colorectal cancer</b> |                      |                             |
| Caco-2                   | DSMZ/ IMDM           | 1025 ± 193 / > 5000         |
| CL-11                    | DSMZ/ DMEM Ham's F12 | 595.0 ± 68.4 / > 5000       |
| CL-14                    | DSMZ/DMEM Ham's F12  | 1229.2 ± 151.6 / > 5000     |
| CL-34                    | DSMZ/ DMEM Ham's F12 | 179.2 ± 20.8 / 366.4 ± 45.1 |
| DLD-1                    | DSMZ/ RPMI 1640      | 365.0 ± 46.5 / > 5000       |
| HCT-15                   | DSMZ/ RPMI 1640      | 213.3 ± 18.2 / > 5000       |
| HT-29                    | DSMZ/ McCoy's 5a     | 272.7 ± 10.1 / > 5000       |
| LoVo                     | ICLC/RPMI 1640       | 352.6 ± 21.0 / > 5000       |
| RKO                      | ATCC/ MEM            | 252.1 ± 9.4 / 2739 ± 411    |
| SW48                     | ATCC/Leibovitz's L15 | 335.8 ± 49.6 / > 5000       |
| SW-403                   | DSMZ/ DMEM           | 240.1 ± 28.3 / > 5000       |
| SW480                    | ATCC/Leibovitz's L15 | 367.6 ± 44.9 / > 5000       |
| SW620                    | ATCC/Leibovitz's L15 | 269.3 ± 34.8 / > 5000       |
| <b>Ewing's sarcoma</b>   |                      |                             |
| A-673                    | ATCC/DMEM            | 399.5 ± 15.3 / 469.5 ± 25.8 |
| CADO-ES-1                | DSMZ/ RPMI 1640      | 475.2 ± 23.9 / > 5000       |
| MHH-ES-1                 | DSMZ/ RPMI 1640      | 130.7 ± 6.9 / 204.6 ± 22.1  |
| RD-ES                    | DSMZ/ RPMI 1640      | 473.9 ± 18.0 / 2579 ± 312   |
| Rh1                      | Houghton/ IMDM       | 283.1 ± 12.3 / 2884 ± 351   |
| SK-ES-1                  | DSMZ/ McCoy's 5a     | 130.5 ± 12.1 / 270.5 ± 23.6 |
| TC-71                    | DSMZ/ IMDM           | 408.9 ± 25.2 / 597.3 ± 37.9 |
| <b>Gastric cancer</b>    |                      |                             |
| 23132/87                 | DSMZ/ RPMI 1640      | 709.5 ± 98.1 / > 5000       |
| AGS                      | CLS/ DMEM            | 223.8 ± 24.5 / > 5000       |
| CLS-145                  | CLS/ Ham's F12       | 2494 ± 286 / > 5000         |
| HGC-27                   | CLS/ DMEM Ham's F12  | 248.5 ± 29.2 / > 5000       |
| KATO-III                 | CLS/ Ham's F12       | 349.6 ± 39.4 / > 5000       |
| MKN1                     | JCRB/RPMI 1640       | > 5000 / > 5000             |
| MKN45                    | JCRB/RPMI 1640       | 605.4 ± 103.8 / > 5000      |
| NUGC-4                   | JCRB/RPMI 1640       | > 5000 / > 5000             |
| SK-GT-2                  | DSMZ/ MEM            | 510.2 ± 75.3 / 2881 ± 301   |
| <b>Glioma</b>            |                      |                             |
| A-172                    | ATCC/DMEM            | 309.8 ± 25.1 / 2098 ± 177   |
| D247                     | Naumann/ IMDM        | 301.8 ± 38.2 / > 5000       |
| G62                      | von Laer/ IMDM       | 355.3 ± 13.6 / > 5000       |
| GMS-10                   | DSMZ/ DMEM           | 582.3 ± 20.7 / > 5000       |
| GOS-3                    | DSMZ/ DMEM           | 432.4 ± 68.6 / > 5000       |
| LN-18                    | ATCC/ DMEM           | 336.3 ± 37.9 / 604.6 ± 73.1 |
| LN-229                   | ATCC/ DMEM           | 363.0 ± 31.9 / > 5000       |

|                                 |                                |                              |
|---------------------------------|--------------------------------|------------------------------|
| LN-405                          | DSMZ/ DMEM                     | > 5,000 / > 5000             |
| MZ18                            | Edinger Institute/ IMDM        | 1031 ± 127 / > 5000          |
| T98G                            | ATCC/ IMDM                     | 302.4 ± 33.8 / > 5000        |
| TU132                           | Naumann/ IMDM                  | > 5000 / > 5000              |
| TU140                           | Naumann/ IMDM                  | 342.1 ± 39.0 / > 5000        |
| U-138 MG                        | ATCC/MEM                       | > 5000 / > 5000              |
| U138                            | Naumann/ IMDM                  | 338.2 ± 39.6 / > 5000        |
| U-251 MG                        | CLS / MEM                      | > 5000 / > 5000              |
| U343                            | CLS / MEM                      | 304.7 ± 4.1 / > 5000         |
| U373MG                          | ATCC/ IMDM                     | 374.0 ± 40.4 / > 5000        |
| U-87 MG                         | ATCC/MEM                       | > 5000 / > 5000              |
| <b>Head and neck cancer</b>     |                                |                              |
| CAL 27                          | ATCC/DMEM                      | 180.9 ± 11.8 / > 5000        |
| CAL-33                          | DSMZ/ DMEM                     | 86.3 ± 12.6 / 639.0 ± 89.5   |
| CLS-354                         | CLS/ DMEM Ham's F12            | 82.0 ± 7.6 / 262.6 ± 29.2    |
| SCC-4                           | ATCC/DMEM F12 + hydrocortisone | 378.8 ± 23.6 / > 5000        |
| SCC25                           | DSMZ/ DMEM Ham's F12           | 359.2 ± 28.3 / 655.7 ± 80.8  |
| <b>Hepatocellular carcinoma</b> |                                |                              |
| HEP-3B                          | DSMZ/ MEM                      | 436.7 ± 54.7 / > 5000        |
| HEP-G2                          | DSMZ/RPMI 1640                 | 362.7 ± 19.3 / > 5000        |
| HLE                             | JCRB/DMEM                      | 1605 ± 326 / > 5000          |
| HLF                             | JCRB/DMEM                      | 2619 ± 455 / > 5000          |
| HUH-6 Clone 5                   | JCRB/DMEM                      | > 5000 / > 5000              |
| HuH-7                           | JCRB /DMEM                     | > 5000 / > 5000              |
| PLC-PRF-5                       | CLS/ DMEM                      | 459.0 ± 69.4 / > 5000        |
| SK-HEP-1                        | CLS/ RPMI 1640                 | > 5000 / > 5000              |
| SNU-182                         | ATCC/ RPMI 1640                | 395.3 ± 42.7 / 882.6 ± 92.3  |
| SNU-449                         | ATCC/ RPMI 1640                | 345.9 ± 38.3 / > 5000        |
| <b>Leukaemia/lymphoma</b>       |                                |                              |
| C8166                           | NIBSC/RPMI 1640                | 51.4 ± 6.7 / 101.7 ± 12.5    |
| CCRF-CEM                        | ATCC/ RPMI 1640                | 221.7 ± 34.9 / 495.5 ± 50.3  |
| CTV-1                           | DSMZ/ RPMI 1640                | 67.0 ± 13.6 / 112.7 ± 13.6   |
| EM-2                            | DSMZ/ RPMI 1640                | 167.1 ± 21.8 / 582.5 ± 62.6  |
| EM-3                            | DSMZ/ RPMI 1640                | 524.2 ± 67.4 / 4988 ± 322    |
| H9                              | ATCC/ RPMI 1640                | 398.9 ± 25.2 / > 5000        |
| HDLM2                           | DSMZ/ RPMI 1640                | 204.9 ± 17.6 / 968.2 ± 121.5 |
| HEL                             | DSMZ/ RPMI 1640                | 358.2 ± 27.5 / 905.8 ± 98.3  |
| HL60                            | ATCC/ IMDM                     | 111.9 ± 18.1 / 236.2 ± 22.7  |
| HuT 78                          | ATCC/ IMDM                     | 227.7 ± 16.3 / 343.5 ± 29.4  |
| JJHan                           | ATCC/ IMDM                     | 336.2 ± 39.6 / 962.8 ± 105.1 |
| JK-1                            | DSMZ/ RPMI 1640                | 73.7 ± 16.0 / 231.6 ± 44.7   |

|                    |                                      |                              |
|--------------------|--------------------------------------|------------------------------|
| JURKAT             | DSMZ/ RPMI 1640                      | 123.3 ± 10.5 / 201.8 ± 10.3  |
| K-562              | ATCC/ IMDM                           | 98.0 ± 8.5 / 347.2 ± 48.6    |
| KARPAS-231         | DSMZ/ RPMI 1640                      | 230.5 ± 27.1 / 459.2 ± 50.6  |
| KASUMI-2           | DSMZ/ RPMI 1640                      | 272.4 ± 16.8 / 567.3 ± 30.8  |
| KCL-22             | DSMZ/ RPMI 1640                      | 345.3 ± 39.3 / 571.6 ± 71.8  |
| KE-37              | DSMZ/ RPMI 1640                      | 285.6 ± 39.2 / 533.5 ± 78.1  |
| KG-1               | DSMZ/ RPMI 1640                      | 80.4 ± 11.7 / 246.2 ± 47.9   |
| KM-H2              | DSMZ/ RPMI 1640                      | 153.9 ± 13.6 / 3184 ± 227    |
| KU-812             | DSMZ/ RPMI 1640                      | 105.0 ± 12.3 / 229.2 ± 34.1  |
| KYO-1              | DSMZ/ RPMI 1640                      | 247.9 ± 29.9 / 291.4 ± 22.8  |
| L-1236             | DSMZ/ RPMI 1640                      | 80.0 ± 14.9 / > 5000         |
| L-428              | DSMZ/ RPMI 1640                      | 178.9 ± 23.2 / 1229 ± 151    |
| L-540              | DSMZ/ RPMI 1640                      | 79.2 ± 8.9 / 321.3 ± 36.6    |
| LAMA-84            | DSMZ/ RPMI 1640                      | 170.3 ± 21.4 / 464.7 ± 63.1  |
| LOUCY              | DSMZ/ RPMI 1640                      | 198.5 ± 27.1 / 553.2 ± 72.9  |
| MEG-01             | DSMZ/ RPMI 1640                      | 296.4 ± 30.0 / 588.5 ± 75.8  |
| MHH-CALL-4         | DSMZ/ RPMI 1640                      | 229.6 ± 46.2 / > 5000        |
| MN-60              | DSMZ/ Ham's F10                      | 314.4 ± 39.3 / 463.3 ± 55.8  |
| MOLM-6             | DSMZ/ RPMI 1640                      | 53.7 ± 14.6 / 119.8 ± 13.9   |
| MOLM-13            | DSMZ/ RPMI 1640                      | 175.9 ± 6.5 / 406.9 ± 43.7   |
| MOLT-4             | DSMZ/ RPMI 1640                      | 180.3 ± 21.7 / 424.7 ± 33.4  |
| MT2                | ECACC/ RPMI 1640                     | 94.7 ± 9.1 / 554.6 ± 63.8    |
| MT4                | ECACC/RPMI 1640                      | 110.5 ± 27.6 / 120.0 ± 31.5  |
| MV4-11             | DSMZ/ RPMI 1640                      | 498.2 ± 57.4 / 887.0 ± 115.8 |
| OCI-AML-2          | DSMZ/ alpha-MEM                      | 337.5 ± 58.6 / 585.1 ± 46.9  |
| OCI-AML-3          | DSMZ/ alpha-MEM                      | 150.1 ± 21.8 / 290.2 ± 30.4  |
| OCI-AML-5          | DSMZ/ alpha-MEM + GM-CSF             | 445.1 ± 80.8 / 790.2 ± 60.8  |
| P12-ICHIKAWA       | DSMZ/ RPMI 1640                      | > 5000 / > 5000              |
| PL-21              | DSMZ/ RPMI 1640                      | 134.7 ± 16.6 / 218.9 ± 23.0  |
| ROS-50             | DSMZ/ RPMI 1640                      | 270.0 ± 36.4 / 4672 ± 508    |
| SEM                | DSMZ/ IMDM                           | 313.0 ± 39.4 / 531.8 ± 61.5  |
| SIG-M5             | DSMZ/ IMDM                           | 126.3 ± 8.7 / 261.5 ± 28.3   |
| SUP-T11            | DSMZ/ RPMI 1640                      | 141.8 ± 20.6 / 251.6 ± 38.7  |
| TANOUE             | DSMZ/ RPMI 1640                      | 296.5 ± 48.1 / > 5000        |
| THP-1              | ATCC / RPMI 1640 + 2-mercaptoethanol | 149.8 ± 30.0 / 337.6 ± 62.2  |
| U-937              | DSMZ/ RPMI 1640                      | 84.4 ± 9.5 / 167.2 ± 12.5    |
| UT-7               | DSMZ/ alpha-MEM                      | 113.0 ± 16.8 / 752.0 ± 86.9  |
| <b>Lung cancer</b> |                                      |                              |
| A549               | ATCC/ MEM                            | 372.5 ± 47.9 / > 5000        |
| CAL-12T            | DSMZ/DMEM                            | 328.4 ± 37.8 / 2946 ± 393    |
| CaLu-1             | CLS/MEM                              | 241.4 ± 27.3 / > 5000        |
| Calu-6             | CLS/ RPMI 1640                       | 106.6 ± 12.2 / 2473 ± 205    |
| DMS-79             | CLS/ RPMI 1640                       | > 5000 / > 5000              |
| H-1339             | DSMZ/RPMI 1640                       | 261.7 ± 32.8 / > 5000        |
| H2228              | ATCC/ RPMI 1640                      | > 5000 / > 5000              |

|                        |                                            |                             |
|------------------------|--------------------------------------------|-----------------------------|
| HCC-15                 | DSMZ/ RPMI 1640                            | 216.4 ± 34.6 / 293.4 ± 30.8 |
| HCC-44                 | DSMZ/ RPMI 1640                            | 208.8 ± 20.4 / 485.1 ± 40.7 |
| HCC-366                | DSMZ/RPMI 1640                             | 331.2 ± 46.9 / > 5000       |
| HCC-827                | DSMZ/ RPMI 1640                            | 225.1 ± 25.6 / > 5000       |
| HCC4006                | ATCC/ RPMI 1640                            | 286.6 ± 41.9 / > 5000       |
| LCLC-97TM1             | DSMZ/RPMI 1640                             | 62.6 ± 8.0 / 216.4 ± 28.9   |
| NCI-H69                | CLS/ RPMI 1640                             | 409.8 ± 60.8 / 676.4 ± 82.2 |
| NCI-H82                | CLS/ RPMI 1640                             | 198.1 ± 25.4 / 1337 ± 144   |
| NCI-H146               | CLS/RPMI 1640                              | > 5000 / > 5000             |
| NCI-H209               | CLS/IMDM                                   | 291.5 ± 8.5 / 564.3 ± 38.3  |
| PC-9                   | ECACC/RPMI 1640                            | 126.0 ± 3.6 / 301.6 ± 5.7   |
| SCLC-22H               | CLS/DMEM                                   | 190.9 ± 3.1 / > 5000        |
| SK-MES-1               | CLS/DMEM                                   | 138.8 ± 15.2 / > 5000       |
| <b>Medulloblastoma</b> |                                            |                             |
| CHLA-01-MED            | ATCC/DMEM F12 + EGF, bFGF, B-27 supplement | 286.4 ± 20.0 / > 5000       |
| D283 Med               | ATCC/MEM                                   | 121.6 ± 9.3 / 246.8 ± 45.0  |
| D341 Med               | ATCC/MEM                                   | 2453 ± 287 / > 5000         |
| Daoy                   | ATCC/MEM                                   | 176.6 ± 13.1 / 291.7 ± 22.6 |
| HD-MB03                | Witt/ IMDM                                 | 124.6 ± 15.6 / 374.8 ± 20.3 |
| MHH-Med-1              | Pietsch/ IMDM                              | 445.0 ± 32.2 / 1965 ± 204   |
| ONS-76                 | Edinger Institute/ IMDM                    | > 5000 / > 5000             |
| UW228                  | Edinger Institute/ IMDM                    | 520.0 ± 59.1 / > 5000       |
| <b>Melanoma</b>        |                                            |                             |
| Colo-679               | DSMZ/ IMDM                                 | 477.2 ± 33.4 / > 5000       |
| IGR-1                  | DSMZ/ IMDM                                 | 232.6 ± 25.8 / > 5000       |
| IGR-39                 | DSMZ/ IMDM                                 | 317.4 ± 14.2 / 3135 ± 442   |
| IPC-298                | DSMZ/ IMDM                                 | 453.6 ± 59.7 / > 5000       |
| MelHO                  | DSMZ/ IMDM                                 | 422.3 ± 30.1 / > 5000       |
| MelJuso                | DSMZ/ IMDM                                 | 1849 ± 279 / > 5000         |
| MeWo                   | ATCC/ IMDM                                 | 381.5 ± 39.2 / > 5000       |
| RPMI-7951              | DSMZ/DMEM                                  | 1112 ± 203 / > 5000         |
| RVH-421                | DSMZ/ IMDM                                 | 614.1 ± 48.6 / > 5000       |
| SK-Mel-3               | DSMZ/ IMDM                                 | 256.7 ± 30.3 / > 5000       |
| SK-Mel-30              | DSMZ/ IMDM                                 | 490.8 ± 20.6 / > 5000       |
| SK-Mel-31              | ATCC/ IMDM                                 | 399.2 ± 47.1 / > 5000       |
| WM164                  | Wistar Institute/ IMDM                     | 284.2 ± 34.9 / > 5000       |
| <b>Mesothelioma</b>    |                                            |                             |
| DM-3                   | DSMZ/ DMEM                                 | 2102 ± 249 / > 5000         |
| JL-1                   | DSMZ/ DMEM                                 | 537.5 ± 61.4 / > 5000       |
| MSTO-211H              | DSMZ/ RPMI 1640                            | 392.8 ± 66.1 / > 5000       |
| RS-5                   | DSMZ/NCTC-109                              | 1910 ± 244 / > 5000         |
| ZL5                    | ECACC/DMEM Ham's F12                       | 155.6 ± 16.4 / 1892 ± 210   |



|                         |                                                                 |                              |
|-------------------------|-----------------------------------------------------------------|------------------------------|
| ZL55                    | ECACC / DMEM Ham's F12                                          | 151.4 ± 16.9 / 513.0 ± 76.6  |
| <b>Multiple myeloma</b> |                                                                 |                              |
| EJM                     | DSMZ/ IMDM                                                      | 358.6 ± 61.9 / 857.5 ± 250.6 |
| JIM1                    | ECACC/Fischer's medium + hydrocortisone (Dexter culture medium) | 162.5 ± 20.7 / 337.4 ± 40.8  |
| KARPAS 417              | ECACC/RPMI 1640                                                 | 216.0 ± 34.8 / 462.5 ± 59.3  |
| KARPAS-929              | ECACC/RPMI 1640                                                 | 258.6 ± 45.1 / 309.2 ± 34.7  |
| KMS-12-BM               | DSMZ/ RPMI 1640                                                 | 189.4 ± 15.3 / 474.5 ± 52.1  |
| KMS-12-PE               | DSMZ/ RPMI 1640                                                 | 96.1 ± 7.3 / 181.3 ± 35.2    |
| MOLP-8                  | DSMZ/ RPMI 1640                                                 | 174.4 ± 42.1 / 408.7 ± 45.0  |
| OPM-2                   | DSMZ/ RPMI 1640                                                 | 289.0 ± 10.5 / 411.9 ± 31.0  |
| RPMI-8226               | CLS/ RPMI 1640                                                  | 96.2 ± 23.6 / 384.3 ± 72.8   |
| U-266                   | DSMZ/RPMI 1640                                                  | 161.9 ± 13.2 / 382.7 ± 30.4  |
| <b>Neuroblastoma</b>    |                                                                 |                              |
| Be(2)C                  | ATCC/ IMDM                                                      | 114.5 ± 19.7 / 573.0 ± 66.2  |
| CHP-134                 | DSMZ/ RPMI 1640                                                 | 59.8 ± 6.7 / 76.6 ± 8.1      |
| GI-CA-N                 | ICLC/ IMDM                                                      | 181.7 ± 22.3 / 275.1 ± 32.3  |
| GI-ME-N                 | ICLC/ RPMI 1640                                                 | 97.9 ± 14.7 / 614.6 ± 81.3   |
| GOTO                    | JCRB/RPMI 1640                                                  | 461.3 ± 72.8 / 1985 ± 406    |
| IMR-5                   | Eggert/ IMDM                                                    | 125.9 ± 7.0 / 266.3 ± 23.7   |
| IMR-32                  | ATCC/ IMDM                                                      | 97.2 ± 42.8 / 226.0 ± 23.1   |
| Kelly                   | ECACC / RPMI 1640                                               | 285.1 ± 31.8 / 805.4 ± 96.3  |
| LAN-1                   | DSMZ/ IMDM                                                      | 94.7 ± 18.4 / 422.9 ± 57.0   |
| LAN-2                   | DSMZ/ RPMI 1640                                                 | 75.3 ± 10.6 / 212.5 ± 25.9   |
| LAN-5                   | ICLC/ IMDM                                                      | 249.0 ± 33.7 / 674.8 ± 75.5  |
| LAN-6                   | DSMZ / DMEM                                                     | 228.2 ± 39.4 / 666.3 ± 99.5  |
| LS                      | DSMZ/ RPMI 1640                                                 | 312.8 ± 42.4 / 368.9 ± 45.7  |
| MHH-NB-11               | DSMZ/ RPMI 1640                                                 | 85.1 ± 16.3 / 137.1 ± 22.5   |
| NB69                    | ECACC/ RPMI 1640                                                | 348.5 ± 45.1 / 1155 ± 137    |
| NB-S-124                | Westermann/ IMDM                                                | 75.2 ± 20.2 / 159.5 ± 8.4    |
| NBL-S                   | DSMZ/IMDM                                                       | 293.9 ± 40.2 / 607.5 ± 86.1  |
| NGP                     | DSMZ/ IMDM                                                      | 303.7 ± 45.3 / 1781 ± 451    |
| NLF                     | Eggert/ IMDM                                                    | 141.0 ± 15.6 / 261.9 ± 77.0  |
| NMB                     | DSMZ/DMEM                                                       | 53.0 ± 6.5 / 306.6 ± 33.9    |
| SHEP                    | Eggert/ IMDM                                                    | 225.8 ± 8.3 / 426.1 ± 12.9   |
| SH-SY5Y                 | ATCC/ MEM F12                                                   | 166.8 ± 14.6 / 479.7 ± 58.6  |
| SIMA                    | DSMZ/ RPMI 1640                                                 | 45.7 ± 6.4 / 119.0 ± 25.8    |
| SK-N-AS                 | ATCC/ DMEM                                                      | 159.3 ± 38.8 / 352.3 ± 84.0  |
| SK-N-F1                 | ECACC/DMEM                                                      | 168.2 ± 18.0 / > 5000        |
| SK-N-SH                 | ATCC/ MEM                                                       | 133.7 ± 20.9 / 341.6 ± 39.0  |
| UKF-NB-1                | Cinatl/ IMDM                                                    | 243.6 ± 29.3 / 567.1 ± 72.8  |
| UKF-NB-2                | Cinatl/ IMDM                                                    | 128.0 ± 22.3 / 283.4 ± 35.1  |
| UKF-NB-3                | Cinatl/ IMDM                                                    | 48.0 ± 7.9 / 102.3 ± 12.7    |
| UKF-NB-4                | Cinatl/ IMDM                                                    | 134.9 ± 33.4 / 276.8 ± 22.0  |

|                           |                               |                             |
|---------------------------|-------------------------------|-----------------------------|
| UKF-NB-5                  | Cinatl/ IMDM                  | 113.8 ± 7.5 / 231.6 ± 19.8  |
| UKF-NB-6                  | Cinatl/ IMDM                  | 207.3 ± 19.3 / 335.6 ± 49.9 |
| <b>Oesophageal cancer</b> |                               |                             |
| COLO-680N                 | CLS/ RPMI 1640                | 180.0 ± 65.5 / > 5000       |
| KYSE-30                   | DSMZ/RPMI 1640 +<br>Ham's F12 | 180.7 ± 25.4 / > 5000       |
| KYSE-70                   | DSMZ/RPMI 1640                | 650.0 ± 52.3 / > 5000       |
| KYSE-140                  | DSMZ/ RPMI 1640               | 294.8 ± 11.8 / > 5000       |
| KYSE-450                  | DSMZ/ RPMI 1640 Ham's<br>F12  | 139.4 ± 22.5 / 1451 ± 137   |
| T.T                       | JCRB/DMEM Ham's F12           | 4248 ± 669 / > 5000         |
| <b>Osteosarcoma</b>       |                               |                             |
| 143B                      | ATCC/MEM                      | 316.3 ± 22.6 / > 5000       |
| CAL-72                    | DSMZ/DMEM                     | 251.0 ± 33.5 / > 5000       |
| HOS                       | ICLC/DMEM                     | 460.8 ± 59.0 / > 5000       |
| MG-63                     | ICLC/DMEM                     | 436.3 ± 51.8 / > 5000       |
| NY                        | JCRB/ MEM                     | 369.6 ± 71.5 / 2647 ± 538   |
| SAOS-2                    | DSMZ/McCoy's 5a               | 271.8 ± 24.7 / > 5000       |
| SJSA-1                    | ATCC/RPMI 1640                | 661.7 ± 98.3 / > 5000       |
| UKF-OS-1                  | Cinatl/IMDM                   | 142.4 ± 12.1 / 434.8 ± 57.2 |
| <b>Ovarian cancer</b>     |                               |                             |
| Caov-3                    | ATCC/ IMDM                    | 304.3 ± 24.5 / > 5000       |
| COLO-704                  | DSMZ/ RPMI 1640               | 195.2 ± 28.1 / > 5000       |
| EFO-21                    | DSMZ/ RPMI 1640               | 166.9 ± 20.6 / > 5000       |
| EFO-27                    | DSMZ/ RPMI 1640               | 127.5 ± 16.2 / > 5000       |
| FU-OV-1                   | DSMZ/DMEM Ham's F12           | > 5000 / > 5000             |
| KURAMOCHI                 | JCRB/RPMI 1640                | 161.1 ± 26.8 / > 5000       |
| MCAS                      | JCRB/MEM                      | 575.9 ± 110.8 / > 5000      |
| OAW-42                    | CLS/ DMEM                     | 1451 ± 175 / > 5000         |
| PA-1                      | JCRB/ MEM                     | 615.2 ± 38.3 / 4173 ± 791   |
| SKOV-3                    | ATCC/ McCoy's 5a              | 176.4 ± 21.3 / > 5000       |
| <b>Pancreas cancer</b>    |                               |                             |
| AsPC-1                    | CLS/ RPMI 1640                | 734.1 ± 80.9 / > 5000       |
| Capan-1                   | CLS/RPMI 1640                 | 311.2 ± 34.7 / > 5000       |
| CAPAN-2                   | DSMZ/ RPMI 1640               | 143.7 ± 15.6 / > 5000       |
| HUP-T3                    | DSMZ/ MEM                     | 445.1 ± 39.5 / > 5000       |
| HUP-T4                    | DSMZ/ MEM                     | 361.6 ± 34.8 / > 5000       |
| DAN-G                     | CLS/RPMI 1640                 | 309.4 ± 48.2 / > 5000       |
| Panc-1                    | CLS/ DMEM                     | 1035 ± 139 / > 5000         |
| PA-CLS 52                 | CLS/ MEM                      | 335.1 ± 36.2 / > 5000       |
| PA-TU-8902                | DSMZ/ DMEM                    | 235.4 ± 30.4 / > 5000       |

|                             |                                              |                             |
|-----------------------------|----------------------------------------------|-----------------------------|
| YAPC                        | DSMZ/ RPMI 1640                              | 505.8 ± 62.7 / > 5000       |
| <b>Prostate carcinoma</b>   |                                              |                             |
| 22RV1                       | DSMZ/ RPMI 1640<br>DMEM                      | 560.1 ± 59.5 / > 5000       |
| DU145                       | DSMZ/ RPMI 1640                              | 666.1 ± 62.3 / > 5000       |
| LNCAP                       | DSMZ/ RPMI 1640                              | 395.6 ± 48.2 / > 5000       |
| PC-3                        | DSMZ/ RPMI 1640 Ham's<br>F12                 | 372.3 ± 38.1 / > 5000       |
| VCaP                        | ATCC/ DMEM                                   | 464.3 ± 39.6 / > 5000       |
| <b>Renal cell carcinoma</b> |                                              |                             |
| 786-O                       | CLS/RPMI 1640                                | 196.5 ± 22.6 / > 5000       |
| 769-P                       | CLS/RPMI 1640                                | 290.1 ± 38.2 / 642.4 ± 75.9 |
| A498                        | DSMZ/MEM                                     | 927.8 ± 112.9 / > 5000      |
| A-704                       | CLS/ MEM                                     | 651.5 ± 129.2 / 1913 ± 285  |
| ACHN                        | CLS/ MEM                                     | 525.7 ± 72.5 / 3698 ± 406   |
| CAKI-1                      | DSMZ/McCoy's 5a                              | 489.1 ± 90.7 / > 5000       |
| CAKI-2                      | DSMZ/ McCoy's 5a                             | 220.1 ± 14.4 / > 5000       |
| CAL-54                      | DSMZ/DMEM +<br>hydrocortisone + EGF          | 210.2 ± 15.1 / > 5000       |
| CLS-439                     | CLS/ McCoy's 5a                              | 256.2 ± 35.4 / > 5000       |
| UKF-RC-1                    | Cinatl/ IMDM                                 | 992.0 ± 109.3 / > 5000      |
| <b>Retinoblastoma</b>       |                                              |                             |
| RB247C                      | ECACC/ IMDM + insulin +<br>2-mercaptoethanol | 715.5 ± 89.1 / > 5000       |
| WERI-Rb1                    | ATCC/ RPMI 1640                              | > 5,000 / > 5000            |
| Y79                         | ATCC/ RPMI 1640                              | 1,824 ± 311 / > 5000        |
| <b>Rhabdomyosarcoma</b>     |                                              |                             |
| AX-OH-1                     | Koscielniak/ IMDM                            | 425.6 ± 59.5 / 3619 ± 422   |
| FL-OH-1                     | Koscielniak/ IMDM                            | > 5000 / > 5000             |
| HA-OH-1                     | Koscielniak/ IMDM                            | 56.5 ± 3.8 / 114.1 ± 8.6    |
| HS-729                      | CLS/ DMEM                                    | 444.6 ± 85.3 / 2337 ± 281   |
| KFR                         | Cinatl/ IMDM                                 | 870.3 ± 77.8 / > 5000       |
| KYM-1                       | JCRB/DMEM Ham's F12                          | 2273 ± 393 / > 5000         |
| RD                          | ATCC/ DMEM                                   | 719.0 ± 80.6 / > 5000       |
| Rh28                        | Houghton/ IMDM                               | > 5000 / > 5000             |
| Rh30                        | DSMZ/ RPMI 1640                              | 483.4 ± 21.8 / > 5000       |
| Rh36                        | Houghton/ IMDM                               | 126.8 ± 13.2 / > 5000       |
| Rh41                        | Houghton/ IMDM                               | 358.5 ± 42.6 / > 5000       |
| RMZ-RC2                     | University of Bologna/<br>DMEM               | 1501 ± 132 / > 5000         |
| UKF-Rhb-1                   | Cinatl/ IMDM                                 | 224.0 ± 35.8 / 445.7 ± 50.3 |
|                             |                                              |                             |

|                                           |                       |                              |
|-------------------------------------------|-----------------------|------------------------------|
| <b>Thyroid cancer</b>                     |                       |                              |
| 8505C                                     | DSMZ/ RPMI 1640       | 530.7 ± 58.3 / > 5000        |
| BHT-101                                   | DSMZ/DMEM             | 311.7 ± 44.6 / > 5000        |
| B-CPAP                                    | DSMZ/RPMI 1640        | 114.1 ± 10.0 / > 5000        |
| MB-1                                      | DSMZ/ IMDM            | 269.9 ± 37.4 / 583.5 ± 61.8  |
| SW579                                     | ATCC/ Leibovitz's L15 | 178.5 ± 27.3 / 535.0 ± 65.9  |
| SW-1736                                   | CLS/ RPMI 1640        | 1361 ± 155 / > 5000          |
| TCO-1                                     | JCRB/DMEM             | 538.6 ± 92.4 / > 5000        |
| <b>Urothelial carcinoma</b>               |                       |                              |
| 5637                                      | ATCC/ IMDM            | 126.0 ± 13.1 / 267.5 ± 33.8  |
| 647-V                                     | DSMZ/DMEM             | 412.2 ± 58.5 / 712.9 ± 90.2  |
| BFTC-905                                  | DSMZ/ DMEM            | 268.2 ± 29.6 / > 5000        |
| CAL 29                                    | DSMZ/DMEM             | 665.1 ± 82.6 / > 5000        |
| CLS-439                                   | CLS/ RPMI 1640        | 271.5 ± 31.8 / > 5000        |
| HB-CLS-1                                  | CLS/ RPMI 1640        | 189.0 ± 24.4 / > 5000        |
| HT-1376                                   | ATCC/ IMDM            | 604.5 ± 71.8 / > 5000        |
| JMSU-1                                    | DSMZ/ RPMI 1640       | 425.1 ± 59.5 / > 5000        |
| KU-19-19                                  | DSMZ/RPMI 1640        | 179.5 ± 21.2 / 933.8 ± 110.4 |
| RT112                                     | ATCC/ IMDM            | 373.6 ± 39.9 / 2014 ± 228    |
| RT4                                       | ATCC/ IMDM            | 467.2 ± 59.3 / > 5000        |
| T24                                       | ATCC/ IMDM            | > 5000 / > 5000              |
| TCCSUP                                    | ATCC/ MEM             | 831.9 ± 107.2 / > 5000       |
| UM-UC-6                                   | ECACC/ IMDM           | 47.4 ± 9.3 / 164.9 ± 45.0    |
| VM-CUB1                                   | DSMZ/ DMEM            | 271.3 ± 32.8 / 1936 ± 254    |
| <b>Wilms' tumour<br/>(nephroblastoma)</b> |                       |                              |
| SK-NEP-1                                  | CLS/ McCoy's 5a       | 347.4 ± 38.3 / 570.9 ± 70.5  |
| WiT49                                     | Bjerke/ DMEM F12      | 241.5 ± 34.8 / > 5000        |
| WT-CLS1                                   | CLS/ IMDM             | 718.1 ± 88.3 / > 5000        |

<sup>1</sup> Asterand (Hoyston, UK); ATCC (Manassas, VA, US); Bjerke, Dr. Lynn Bjerke (Institute for Cancer Research, Sutton, UK); Cinatl, Dr. Jindrich Cinatl (Institut für Medizinische Virologie, Frankfurt/M, Germany); CLS (CLS Cell Line Services, Eppelheim, Germany); DSMZ (Braunschweig, Germany), ECACC via Sigma-Aldrich Chemie GmbH (Munich, Germany); Edinger Institute, Institute of Neurology (Edinger Institute, Frankfurt /M, Germany), Eggert, Dr. Angelika Eggert (Universität Duisburg-Essen, Germany); Houghton, Dr. Peter J. Houghton (St. Jude's Children's Research Hospital, Memphis, TN); ICLC (Genova, Italy); JCRB, JCRB Cell Bank (Osaka, Japan); Koscielniak, Dr. Ewa Koscielniak (Olgahospital, Stuttgart, Germany); Naumann, Dr. Ulrike Naumann (Eberhard Karls-Universität; Tübingen, Germany); NIBSC, National Institute for Biological Standards and Control (South Mimms, UK); Pietsch, Dr. Torsten Pietsch (University of Bonn, Germany); von Laer, Dr. Dorothee von Laer (Medizinische Universität Innsbruck, Austria); Westermann, Dr. Frank

Westermann (DKFZ, Heidelberg, Germany); Wistar Institute (Philadelphia, , USA);  
Witt, Dr. Olaf Witt (DKFZ, Heidelberg, Germany)  
2 DMEM, Dulbecco/Vogt Modified Eagle's Minimal Essential Medium; DMEM Ham's  
F12, 1:1 mixture of DMEM and Ham's F12 Nutrient Mixture; MEM, Eagle's Minimal  
Essential Medium; RPMI 1640, Roswell Park Memorial Institute Medium 1640  
The medium for all cell lines was supplemented with 10% FCS.

**Suppl. Table S2.** Sensitivity of parental neuroblastoma cells and their drug-adapted sub-lines to flubendazole as indicated by the concentrations that reduce cell viability by 50% (IC<sub>50</sub>) or 90% (IC<sub>90</sub>) indicated by MTT assay after a five day treatment period.

| Cell line                                 | IC <sub>50</sub> (nM) flubendazole | IC <sub>90</sub> (nM) flubendazole |
|-------------------------------------------|------------------------------------|------------------------------------|
| <b>GI-ME-N</b>                            | <b>97.9 ± 14.7</b>                 | <b>640.8 ± 78.2</b>                |
| GI-ME-N <sup>r</sup> CDDP <sup>500</sup>  | 206.9 ± 25.2 (2.11) <sup>1</sup>   | 614.6 ± 81.3 (0.96) <sup>2</sup>   |
| GI-ME-N <sup>r</sup> DOX <sup>5</sup>     | 78.6 ± 8.9 (0.80)                  | 265.1 ± 30.4 (0.41)                |
| GI-ME-N <sup>r</sup> VCR <sup>14</sup>    | 471.8 ± 59.0 (4.82)                | > 5000 (7.80)                      |
| <b>IMR-5</b>                              | <b>125.9 ± 7.0</b>                 | <b>266.3 ± 23.7</b>                |
| IMR-5 <sup>r</sup> CARBO <sup>5000</sup>  | 106.2 ± 2.7 (0.84)                 | 188.3 ± 15.8 (0.71)                |
| IMR-5 <sup>r</sup> CDDP <sup>1000</sup>   | 144.4 ± 4.5 (1.36)                 | 271.8 ± 36.0 (1.02)                |
| IMR-5 <sup>r</sup> DACARB <sup>20</sup>   | 179.9 ± 26.5 (1.43)                | 483.4 ± 81.7 (1.82)                |
| IMR-5 <sup>r</sup> DOCE <sup>20</sup>     | 143.2 ± 3.0 (1.14)                 | 269.1 ± 27.9 (1.01)                |
| IMR-5 <sup>r</sup> DOX <sup>20</sup>      | 156.4 ± 15.6 (1.24)                | 1308 ± 157 (4.91)                  |
| IMR-5 <sup>r</sup> ETO <sup>100</sup>     | 111.0 ± 5.2 (0.88)                 | 188.3 ± 16.8 (0.71)                |
| IMR-5 <sup>r</sup> GEMCI <sup>20</sup>    | 82.6 ± 15.6 (0.67)                 | 124.6 ± 15.1 (0.47)                |
| IMR-5 <sup>r</sup> IRINO <sup>1000</sup>  | 155.7 ± 19.2 (1.24)                | 375.2 ± 49.5 (1.41)                |
| IMR-5 <sup>r</sup> MEL <sup>3000</sup>    | 130.6 ± 4.3 (1.04)                 | 395.4 ± 44.1 (1.48)                |
| IMR-5 <sup>r</sup> OXALI <sup>4000</sup>  | 89.6 ± 5.8 (0.71)                  | 195.2 ± 22.1 (0.73)                |
| IMR-5 <sup>r</sup> PCL <sup>20</sup>      | 61.6 ± 4.7 (0.49)                  | 119.4 ± 20.6 (0.45)                |
| IMR-5 <sup>r</sup> TOPO <sup>20</sup>     | 75.1 ± 16.7 (0.60)                 | 138.3 ± 16.4 (0.52)                |
| IMR-5 <sup>r</sup> VCR <sup>10</sup>      | 314.7 ± 6.9 (2.50)                 | 431.5 ± 49.6 (1.62)                |
| IMR-5 <sup>r</sup> VINB <sup>20</sup>     | 346.7 ± 20.2 (2.75)                | > 5000 (> 18.78)                   |
| IMR-5 <sup>r</sup> VINOR <sup>20</sup>    | 161.6 ± 4.8 (1.28)                 | 261.5 ± 28.3 (0.98)                |
| <b>IMR-32</b>                             | <b>97.2 ± 42.8</b>                 | <b>226.0 ± 23.1</b>                |
| IMR-32 <sup>r</sup> BORTE <sup>10</sup>   | 170.2 ± 20.8 (1.75)                | 267.1 ± 34.7 (1.18)                |
| IMR-32 <sup>r</sup> CARBO <sup>1000</sup> | 337.1 ± 30.0 (3.47)                | 637.9 ± 45.4 (2.82)                |
| IMR-32 <sup>r</sup> CDDP <sup>1000</sup>  | 50.1 ± 2.7 (0.52)                  | 97.9 ± 9.2 (0.43)                  |
| IMR-32 <sup>r</sup> DOX <sup>20</sup>     | 313.2 ± 11.7 (3.22)                | 1582 ± 205 (7.00)                  |
| IMR-32 <sup>r</sup> ETO <sup>100</sup>    | 237.3 ± 18.8 (2.44)                | 471.8 ± 29.5 (2.09)                |
| IMR-32 <sup>r</sup> GEMCI <sup>25</sup>   | 139.3 ± 4.0 (1.43)                 | 260.6 ± 31.2 (1.15)                |
| IMR-32 <sup>r</sup> MEL <sup>500</sup>    | 126.6 ± 11.1 (1.30)                | 288.4 ± 36.6 (1.28)                |
| IMR-32 <sup>r</sup> OXALI <sup>800</sup>  | 216.1 ± 7.1 (2.22)                 | 4187 ± 337 (18.53)                 |
| IMR-32 <sup>r</sup> TOPO <sup>8</sup>     | 105.5 ± 15.7 (1.09)                | 246.3 ± 33.5 (1.09)                |
| IMR-32 <sup>r</sup> VCR <sup>10</sup>     | 317.8 ± 32.0 (3.27)                | 951.7 ± 82.6 (4.21)                |
| IMR-32 <sup>r</sup> VINOR <sup>5</sup>    | 254.0 ± 12.1 (2.61)                | 618.2 ± 42.5 (2.74)                |
| <b>NGP</b>                                | <b>303.7 ± 45.3</b>                | <b>1781 ± 451</b>                  |
| NGP <sup>r</sup> BORTE <sup>20</sup>      | 238.6 ± 36.1 (0.79)                | 527.2 ± 84.9 (0.30)                |
| NGP <sup>r</sup> CARBO <sup>2000</sup>    | 175.1 ± 29.2 (0.58)                | 499.3 ± 62.7 (0.28)                |
| NGP <sup>r</sup> CDDP <sup>1000</sup>     | 299.0 ± 33.6 (0.98)                | 629.2 ± 89.4 (0.35)                |
| NGP <sup>r</sup> DACARB <sup>18</sup>     | 270.4 ± 67.8 (0.89)                | 1873 ± 382 (1.05)                  |
| NGP <sup>r</sup> DOCE <sup>20</sup>       | 468.4 ± 59.2 (1.54)                | 1672 ± 354 (0.94)                  |
| NGP <sup>r</sup> DOX <sup>20</sup>        | 201.9 ± 37.6 (0.66)                | > 5000 (2.81)                      |
| NGP <sup>r</sup> ETO <sup>200</sup>       | 146.2 ± 17.8 (0.48)                | 372.5 ± 46.4 (0.21)                |
| NGP <sup>r</sup> GEMCI <sup>20</sup>      | 186.7 ± 31.4 (0.61)                | 1227 ± 199 (0.69)                  |
| NGP <sup>r</sup> IRINO <sup>1000</sup>    | 177.6 ± 28.3 (0.58)                | 451.8 ± 70.3 (0.25)                |

|                                            |                      |                      |
|--------------------------------------------|----------------------|----------------------|
| NGP <sup>r</sup> MEL <sup>2000</sup>       | 325.2 ± 40.8 (1.07)  | 1237 ± 196 (0.69)    |
| NGP <sup>r</sup> OXALI <sup>4000</sup>     | 208.3 ± 31.4 (0.69)  | 531.7 ± 99.6 (0.30)  |
| NGP <sup>r</sup> PCL <sup>20</sup>         | 411.3 ± 69.0 (1.35)  | 1065 ± 174 (0.60)    |
| NGP <sup>r</sup> TOPO <sup>20</sup>        | 269.2 ± 47.4 (0.89)  | 1773 ± 308 (1.00)    |
| NGP <sup>r</sup> VCR <sup>100</sup>        | 513.0 ± 62.1 (1.69)  | > 5000 (> 2.81)      |
| NGP <sup>r</sup> VINB <sup>20</sup>        | 362.5 ± 89.4 (1.19)  | > 5000 (> 2.81)      |
| NGP <sup>r</sup> VINOR <sup>20</sup>       | 700.8 ± 113.6 (2.31) | > 5000 (> 2.81)      |
| <b>NLF</b>                                 | <b>141.0 ± 15.6</b>  | <b>261.9 ± 77.0</b>  |
| NLF <sup>r</sup> CARBO <sup>5000</sup>     | 76.4 ± 9.1 (0.54)    | 203.2 ± 15.3 (0.78)  |
| NLF <sup>r</sup> CDDP <sup>1000</sup>      | 94.8 ± 12.1 (0.67)   | 305.1 ± 38.2 (1.16)  |
| NLF <sup>r</sup> DACARB <sup>20</sup>      | 102.8 ± 10.6 (0.73)  | 151.6 ± 19.2 (0.58)  |
| NLF <sup>r</sup> DOCE <sup>20</sup>        | 153.0 ± 16.1 (1.09)  | 180.5 ± 22.7 (0.69)  |
| NLF <sup>r</sup> DOX <sup>40</sup>         | 73.9 ± 11.6 (0.52)   | 163.6 ± 14.6 (0.62)  |
| NLF <sup>r</sup> ETO <sup>100</sup>        | 164.9 ± 20.6 (1.17)  | 280.9 ± 34.7 (1.07)  |
| NLF <sup>r</sup> GEMCI <sup>20</sup>       | 58.2 ± 4.9 (0.41)    | 75.7 ± 9.8 (0.29)    |
| NLF <sup>r</sup> IRINO <sup>1000</sup>     | 87.3 ± 12.6 (0.62)   | 180.2 ± 19.4 (0.69)  |
| NLF <sup>r</sup> MEL <sup>3000</sup>       | 112.2 ± 15.1 (0.80)  | 271.6 ± 30.3 (1.04)  |
| NLF <sup>r</sup> OXALI <sup>4000</sup>     | 131.5 ± 17.0 (0.93)  | 376.3 ± 51.6 (1.44)  |
| NLF <sup>r</sup> PCL <sup>20</sup>         | 51.8 ± 6.2 (0.37)    | 157.4 ± 13.8 (0.60)  |
| NLF <sup>r</sup> TOPO <sup>10</sup>        | 132.3 ± 15.8 (0.94)  | 247.1 ± 28.9 (0.94)  |
| NLF <sup>r</sup> VCR <sup>10</sup>         | 183.5 ± 32.1 (1.30)  | 398.1 ± 50.0 (1.52)  |
| NLF <sup>r</sup> VINB <sup>10</sup>        | 444.8 ± 32.7 (3.15)  | 723.3 ± 122.4 (2.76) |
| NLF <sup>r</sup> VINOR <sup>10</sup>       | 208.6 ± 20.2 (1.48)  | 345.1 ± 29.3 (1.32)  |
| <b>SHEP</b>                                | <b>225.8 ± 8.3</b>   | <b>426.1 ± 12.9</b>  |
| SHEP <sup>r</sup> CDDP <sup>1000</sup>     | 176.9 ± 20.6 (0.78)  | 595.3 ± 71.0 (1.40)  |
| SHEP <sup>r</sup> DOX <sup>100</sup>       | 209.1 ± 23.7 (0.93)  | 516.4 ± 62.8 (1.21)  |
| SHEP <sup>r</sup> ETO <sup>100</sup>       | 162.0 ± 18.5 (0.72)  | 559.7 ± 73.1 (1.31)  |
| SHEP <sup>r</sup> VCR <sup>20</sup>        | 302.1 ± 34.8 (1.34)  | 573.7 ± 67.2 (1.35)  |
| <b>SH-SY5Y</b>                             | <b>166.8 ± 14.6</b>  | <b>479.7 ± 58.6</b>  |
| SH-SY5Y <sup>r</sup> CDDP <sup>200</sup>   | 100.7 ± 13.1 (0.60)  | 331.6 ± 38.7 (0.69)  |
| SH-SY5Y <sup>r</sup> DOX <sup>20</sup>     | 98.7 ± 11.3 (0.59)   | 642.7 ± 75.1 (1.34)  |
| SH-SY5Y <sup>r</sup> VCR <sup>10</sup>     | 227.6 ± 41.3 (1.36)  | 582.8 ± 86.2 (1.21)  |
| <b>SK-N-AS</b>                             | <b>159.3 ± 38.8</b>  | <b>352.3 ± 84.0</b>  |
| SK-N-AS <sup>r</sup> CARBO <sup>2000</sup> | 55.4 ± 10.1 (0.35)   | 189.6 ± 23.8 (0.54)  |
| SK-N-AS <sup>r</sup> CDDP <sup>1000</sup>  | 70.7 ± 13.4 (0.44)   | 252.1 ± 65.6 (0.72)  |
| SK-N-AS <sup>r</sup> DACARB <sup>16</sup>  | 74.2 ± 10.6 (0.47)   | 150.5 ± 23.1 (0.43)  |
| SK-N-AS <sup>r</sup> DOCE <sup>10</sup>    | 187.5 ± 26.4 (1.18)  | > 5000 (> 14.19)     |
| SK-N-AS <sup>r</sup> DOX <sup>10</sup>     | 36.2 ± 4.6 (0.23)    | 72.8 ± 10.1 (0.21)   |
| SK-N-AS <sup>r</sup> ETO <sup>100</sup>    | 75.5 ± 17.2 (0.47)   | 1025 ± 174 (2.91)    |
| SK-N-AS <sup>r</sup> GEMCI <sup>10</sup>   | 86.8 ± 12.6 (0.54)   | 189.2 ± 23.9 (0.54)  |
| SK-N-AS <sup>r</sup> IRINO <sup>500</sup>  | 165.2 ± 23.6 (1.04)  | 276.1 ± 34.1 (0.78)  |
| SK-N-AS <sup>r</sup> MEL <sup>1000</sup>   | 122.4 ± 19.6 (0.77)  | 290.3 ± 41.7 (0.82)  |
| SK-N-AS <sup>r</sup> OXALI <sup>4000</sup> | 342.7 ± 49.3 (2.15)  | > 5000 (> 14.19)     |
| SK-N-AS <sup>r</sup> PCL <sup>20</sup>     | 105.7 ± 20.1 (0.66)  | 639.4 ± 89.0 (1.81)  |
| SK-N-AS <sup>r</sup> TOPO <sup>20</sup>    | 192.1 ± 24.8 (1.21)  | 297.9 ± 35.2 (0.85)  |
| SK-N-AS <sup>r</sup> VCR <sup>20</sup>     | 126.4 ± 18.1 (0.79)  | 279.2 ± 33.5 (0.79)  |
| SK-N-AS <sup>r</sup> VINB <sup>10</sup>    | 115.0 ± 17.8 (0.72)  | 191.3 ± 25.7 (0.54)  |
| SK-N-AS <sup>r</sup> VINOR <sup>20</sup>   | 273.6 ± 33.8 (1.72)  | 676.2 ± 75.7 (1.92)  |
| <b>UKF-NB-1</b>                            | <b>243.6 ± 29.3</b>  | <b>567.1 ± 72.8</b>  |

|                                                 |                      |                      |
|-------------------------------------------------|----------------------|----------------------|
| UKF-NB-1 <sup>r</sup> CDDP <sup>1000</sup>      | 271.4 ± 29.8 (1.11)  | 479.7 ± 51.4 (0.85)  |
| UKF-NB-1 <sup>r</sup> VCR <sup>10</sup>         | 303.7 ± 47.6 (1.25)  | 891.4 ± 163.9 (1.57) |
| <b>UKF-NB-2</b>                                 | <b>128.0 ± 22.3</b>  | <b>283.4 ± 35.1</b>  |
| UKF-NB-2 <sup>r</sup> CARBO <sup>2000</sup>     | 144.3 ± 16.7 (1.13)  | 486.1 ± 89.6 (1.72)  |
| UKF-NB-2 <sup>r</sup> CDDP <sup>1000</sup>      | 115.5 ± 14.3 (0.90)  | 392.6 ± 46.9 (1.39)  |
| UKF-NB-2 <sup>r</sup> DACARB <sup>4</sup>       | 103.4 ± 19.9 (0.81)  | 307.3 ± 46.1 (1.08)  |
| UKF-NB-2 <sup>r</sup> DOCE <sup>10</sup>        | 166.5 ± 39.8 (1.30)  | 489.2 ± 65.5 (1.73)  |
| UKF-NB-2 <sup>r</sup> DOX <sup>20</sup>         | 422.0 ± 27.7 (3.30)  | 660.3 ± 81.5 (2.33)  |
| UKF-NB-2 <sup>r</sup> ETO <sup>40</sup>         | 56.7 ± 9.6 (0.44)    | 189.2 ± 13.3 (0.67)  |
| UKF-NB-2 <sup>r</sup> IRINO <sup>400</sup>      | 272.5 ± 36.2 (2.13)  | > 5000 (> 17.64)     |
| UKF-NB-2 <sup>r</sup> MEL <sup>600</sup>        | 214.2 ± 17.1 (1.67)  | 568.4 ± 60.7 (2.01)  |
| UKF-NB-2 <sup>r</sup> Nutlin <sup>10μM</sup>    | 191.9 ± 21.8 (1.50)  | 562.7 ± 71.5 (1.99)  |
| UKF-NB-2 <sup>r</sup> OXALI <sup>600</sup>      | 125.6 ± 12.3 (0.98)  | 291.7 ± 36.7 (1.03)  |
| UKF-NB-2 <sup>r</sup> PCL <sup>20</sup>         | 138.4 ± 5.2 (1.08)   | 213.6 ± 18.4 (0.75)  |
| UKF-NB-2 <sup>r</sup> TOPO <sup>10</sup>        | 161.3 ± 14.5 (1.26)  | 641.7 ± 72.8 (2.26)  |
| UKF-NB-2 <sup>r</sup> VCR <sup>10</sup>         | 162.4 ± 15.8 (1.27)  | 491.8 ± 61.3 (1.74)  |
| UKF-NB-2 <sup>r</sup> VINB <sup>10</sup>        | 132.6 ± 18.3 (1.04)  | 272.4 ± 20.9 (0.96)  |
| UKF-NB-2 <sup>r</sup> VINOR <sup>10</sup>       | 178.7 ± 13.8 (1.40)  | 299.8 ± 48.2 (1.06)  |
| <b>UKF-NB-3</b>                                 | <b>48.0 ± 7.9</b>    | <b>102.3 ± 12.7</b>  |
| UKF-NB-3 <sup>r</sup> BORTE <sup>20</sup>       | 70.7 ± 14.6 (1.47)   | 301.2 ± 55.1 (2.94)  |
| UKF-NB-3 <sup>r</sup> CABAZI <sup>2</sup>       | 140.2 ± 18.1 (2.92)  | > 5000 (> 48.88)     |
| UKF-NB-3 <sup>r</sup> CARBO <sup>2000</sup>     | 106.4 ± 2.0 (2.22)   | 215.8 ± 21.9 (2.11)  |
| UKF-NB-3 <sup>r</sup> CDDP <sup>1000</sup>      | 63.6 ± 21.7 (1.33)   | 122.1 ± 16.7 (1.19)  |
| UKF-NB-3 <sup>r</sup> DACARB <sup>8</sup>       | 100.5 ± 12.8 (2.09)  | 147.3 ± 18.6 (1.44)  |
| UKF-NB-3 <sup>r</sup> DOCE <sup>20</sup>        | 69.3 ± 15.4 (1.44)   | 125.3 ± 17.1 (1.22)  |
| UKF-NB-3 <sup>r</sup> DOX <sup>20</sup>         | 179.8 ± 8.6 (3.75)   | 241.6 ± 31.4 (2.36)  |
| UKF-NB-3 <sup>r</sup> ETO <sup>200</sup>        | 252.5 ± 33.9 (5.26)  | 538.2 ± 66.1 (5.26)  |
| UKF-NB-3 <sup>r</sup> GEMCI <sup>10</sup>       | 57.7 ± 3.4 (1.20)    | 227.4 ± 49.8 (2.22)  |
| UKF-NB-3 <sup>r</sup> IRINO <sup>800</sup>      | 160.0 ± 21.1 (3.33)  | 187.7 ± 25.3 (1.83)  |
| UKF-NB-3 <sup>r</sup> ME <sup>1000</sup>        | 575.8 ± 69.1 (12.00) | 2072 ± 229 (20.25)   |
| UKF-NB-3 <sup>r</sup> MEL <sup>2000</sup>       | 196.0 ± 14.7 (4.08)  | 816.7 ± 98.2 (7.98)  |
| UKF-NB-3 <sup>r</sup> Nutlin <sup>10μM</sup>    | 201.6 ± 26.0 (4.20)  | 511.3 ± 120.4 (5.00) |
| UKF-NB-3 <sup>r</sup> NVP-TAE684 <sup>500</sup> | 281.7 ± 29.4 (5.89)  | 559.0 ± 61.7 (5.46)  |
| UKF-NB-3 <sup>r</sup> OXALI <sup>2000</sup>     | 143.8 ± 17.8 (3.00)  | 541.5 ± 42.6 (5.29)  |
| UKF-NB-3 <sup>r</sup> PCL <sup>20</sup>         | 93.4 ± 8.0 (1.95)    | 189.6 ± 21.8 (1.85)  |
| UKF-NB-3 <sup>r</sup> RITA <sup>10μM</sup>      | 135.2 ± 18.9 (2.82)  | 244.3 ± 28.5 (2.39)  |
| UKF-NB-3 <sup>r</sup> TOPO <sup>15</sup>        | 155.8 ± 3.9 (3.25)   | 264.1 ± 17.5 (2.58)  |
| UKF-NB-3 <sup>r</sup> VCR <sup>10</sup>         | 214.1 ± 21.4 (4.46)  | 552.3 ± 60.9 (5.40)  |
| UKF-NB-3 <sup>r</sup> VINB <sup>10</sup>        | 163.3 ± 20.8 (3.40)  | 456.2 ± 50.7 (4.46)  |
| UKF-NB-3 <sup>r</sup> VINOR <sup>20</sup>       | 364.5 ± 28.6 (7.59)  | 1325 ± 144 (12.95)   |
| UKF-NB-3 <sup>r</sup> YM155 <sup>50nM</sup>     | 81.3 ± 11.9 (1.69)   | 202.6 ± 25.3 (1.98)  |
| <b>UKF-NB-4</b>                                 | <b>134.9 ± 33.4</b>  | <b>276.8 ± 22.0</b>  |
| UKF-NB-4 <sup>r</sup> CDDP <sup>1000</sup>      | 108.4 ± 16.5 (0.80)  | 351.8 ± 30.3 (1.27)  |
| UKF-NB-4 <sup>r</sup> DOX <sup>350</sup>        | 215.7 ± 76.1 (1.60)  | 841.7 ± 285.7 (3.04) |
| UKF-NB-4 <sup>r</sup> VCR <sup>50</sup>         | 242.3 ± 4.8 (1.80)   | 496.0 ± 63.7 (1.79)  |
| <b>UKF-NB-6</b>                                 | <b>207.3 ± 19.3</b>  | <b>335.6 ± 49.9</b>  |
| UKF-NB-6 <sup>r</sup> CARBO <sup>2000</sup>     | 106.0 ± 6.7 (0.51)   | 329.8 ± 35.5 (0.98)  |
| UKF-NB-6 <sup>r</sup> CDDP <sup>1000</sup>      | 219.2 ± 10.0 (1.06)  | 557.1 ± 43.8 (1.66)  |
| UKF-NB-6 <sup>r</sup> DACARB <sup>8</sup>       | 165.9 ± 18.6 (0.80)  | 291.6 ± 30.5 (0.87)  |



|                                             |                     |                      |
|---------------------------------------------|---------------------|----------------------|
| UKF-NB-6 <sup>r</sup> DOCE <sup>10</sup>    | 195.7 ± 6.9 (0.94)  | 263.7 ± 18.6 (0.79)  |
| UKF-NB-6 <sup>r</sup> DOX <sup>20</sup>     | 214.2 ± 19.4 (1.03) | 404.1 ± 49.4 (1.20)  |
| UKF-NB-6 <sup>r</sup> ETO <sup>200</sup>    | 233.2 ± 30.0 (1.12) | 379.6 ± 26.8 (1.13)  |
| UKF-NB-6 <sup>r</sup> GEMCI <sup>10</sup>   | 261.1 ± 25.2 (1.26) | 577.2 ± 36.4 (1.72)  |
| UKF-NB-6 <sup>r</sup> IRINO <sup>1000</sup> | 236.7 ± 26.2 (1.14) | 340.1 ± 24.7 (1.01)  |
| UKF-NB-6 <sup>r</sup> MEL <sup>2000</sup>   | 275.5 ± 17.1 (1.33) | 513.5 ± 38.3 (1.53)  |
| UKF-NB-6 <sup>r</sup> OXALI <sup>4000</sup> | 139.7 ± 15.4 (0.67) | 242.9 ± 17.2 (0.72)  |
| UKF-NB-6 <sup>r</sup> PCL <sup>20</sup>     | 105.8 ± 17.9 (0.51) | 271.8 ± 22.5 (0.81)  |
| UKF-NB-6 <sup>r</sup> TOPO <sup>20</sup>    | 177.5 ± 18.2 (0.86) | 581.6 ± 61.2 (1.73)  |
| UKF-NB-6 <sup>r</sup> VCR <sup>10</sup>     | 435.3 ± 63.8 (2.10) | 991.7 ± 114.6 (2.96) |
| UKF-NB-6 <sup>r</sup> VINB <sup>10</sup>    | 341.1 ± 19.5 (1.65) | 545.8 ± 30.3 (1.63)  |
| UKF-NB-6 <sup>r</sup> VINOR <sup>40</sup>   | 167.2 ± 10.4 (0.81) | 288.9 ± 19.0 (0.86)  |
| UKF-NB-6 <sup>r</sup> YM155 <sup>20nM</sup> | 176.9 ± 23.5 (0.85) | 382.6 ± 56.6 (1.14)  |

<sup>1</sup> IC<sub>50</sub> resistant sub-line/ IC<sub>50</sub> parental cell line

<sup>2</sup> IC<sub>90</sub> resistant sub-line/ IC<sub>90</sub> parental cell line

**Suppl. Table S3.** Flubendazole concentrations that reduce viability by 50% (IC<sub>50</sub>) or 90% (IC<sub>90</sub>) in primary neuroblastoma cells as determined by MTT assay after a five day treatment period.

---

|           | IC <sub>50</sub> (nM)<br>flubendazole | IC <sub>90</sub> (nM)<br>flubendazole |
|-----------|---------------------------------------|---------------------------------------|
| isolate 1 | 54.7 ± 12.7                           | 612.2 ± 98.9                          |
| isolate 2 | 235.2 ± 30.0                          | 522.8 ± 78.4                          |
| isolate 3 | 190.2 ± 14.7                          | 573.5 ± 49.8                          |
| isolate 4 | 117.6 ± 19.3                          | 599.8 ± 44.8                          |
| isolate 5 | 135.1 ± 12.6                          | 464.7 ± 67.2                          |

---

**Suppl. Table S4.** Anti-cancer effects of flubendazole in ABCB1- and ABCG2-expressing cells. Concentrations that reduce cell viability by 50% (IC<sub>50</sub>) have been determined by MTT assay after a five day treatment period.

| Cell line                            | IC <sub>50</sub> (μM)<br>flubendazole | IC <sub>50</sub> (ng/ml)<br>vincristine <sup>1</sup> | IC <sub>50</sub> (ng/ml)<br>mitoxantrone <sup>2</sup> |
|--------------------------------------|---------------------------------------|------------------------------------------------------|-------------------------------------------------------|
| UKF-NB-3                             | 46.1 ± 6.4                            | 0.204 ± 0.022                                        |                                                       |
| + verapamil (92 ± 10%) <sup>3</sup>  | 40.1 ± 6.7                            | 0.151 ± 0.013                                        |                                                       |
| ... <sup>r</sup> VCR <sup>10 4</sup> | 201.2 ± 17.5                          | 61.1 ± 10.8                                          |                                                       |
| + verapamil (89 ± 11%)               | 194.0 ± 9.3                           | 1.300 ± 0.211                                        |                                                       |
| ... <sup>ABCB1 5</sup>               | 63.2 ± 8.5                            | 21.5 ± 3.0                                           |                                                       |
| + verapamil (93 ± 6%)                | 52.9 ± 6.2                            | 0.143 ± 0.012                                        |                                                       |
| ... <sup>Cer2 6</sup>                | 55.6 ± 7.1                            | 0.292 ± 0.033                                        |                                                       |
| + verapamil (90 ± 8%)                | 48.2 ± 7.9                            | 0.276 ± 0.030                                        |                                                       |
| UKF-NB-3                             | 45.0 ± 5.3                            |                                                      | 0.118 ± 0.014                                         |
| + WK-X-34 (99 ± 9%) <sup>7</sup>     | 46.3 ± 7.9                            |                                                      | 0.100 ± 0.09                                          |
| ... <sup>ABCG2 8</sup>               | 68.5 ± 12.4                           |                                                      | 45.2 ± 7.5                                            |
| + WK-X-34 (105 ± 7%)                 | 53.2 ± 12.2                           |                                                      | 0.160 ± 0.016                                         |
| ... <sup>iG2 9</sup>                 | 44.8 ± 4.9                            |                                                      | 0.143 ± 0.017                                         |
| + WK-X-34 (102 ± 5%)                 | 37.5 ± 3.5                            |                                                      | 0.138 ± 0.017                                         |

<sup>1</sup> cytotoxic ABCB1 substrate; <sup>2</sup> cytotoxic ABCG2 substrate; <sup>3</sup> verapamil (10μM), ABCB1 inhibitor (cell viability in the presence of verapamil alone); <sup>4</sup> cell line characterised by high ABCB1 expression; <sup>5</sup> UKF-NB-3 cells transduced with a lentiviral vector encoding for ABCB1; <sup>6</sup> UKF-NB-3 cells transduced with a vector control corresponding to UKF-NB-3<sup>ABCB1</sup>; <sup>7</sup> WK-X-34 (1μM) ABCG2 inhibitor (cell viability in the presence of WK-X-34 alone); <sup>8</sup> UKF-NB-3 cells transduced with a lentiviral vector encoding for BCRP/ABCG2; <sup>9</sup> UKF-NB-3 cells transduced with a vector control corresponding to UKF-NB-3<sup>ABCG2</sup>

**Suppl. Table S5.** Effects of wild-type p53 depletion on the flubendazole sensitivity of neuroblastoma cells. p53 was depleted using a lentiviral vector encoding for p53 shRNA. Concentrations that reduce cell viability by 50% (IC<sub>50</sub>) or 90% (IC<sub>90</sub>) were determined by MTT assay after a five day incubation period and ratios of the flubendazole IC<sub>50</sub>s and IC<sub>90</sub>s in the p53-depleted cells vs. the parental cells were calculated.

| Cell line      | IC <sub>50</sub> (nM)/IC <sub>90</sub> (nM)<br>flubendazole | IC <sub>50</sub><br>transduced<br>sub-line/<br>IC <sub>50</sub> parental<br>cell line | IC <sub>90</sub><br>transduced<br>sub-line/<br>IC <sub>90</sub> parental<br>cell line |
|----------------|-------------------------------------------------------------|---------------------------------------------------------------------------------------|---------------------------------------------------------------------------------------|
| IMR-32         | 97.2 ± 42.8 / 186.0 ± 23.1                                  |                                                                                       |                                                                                       |
| ... p53shRNA 1 | 188.5 ± 13.7 / 298.2 ± 30.2                                 | 1.9                                                                                   | 1.6                                                                                   |
| ... scr 2      | 71.1 ± 15.6 / 157.2 ± 20.5                                  | 0.7                                                                                   | 0.8                                                                                   |
| LAN-5          | 249.0 ± 33.7 / 674.8 ± 75.5                                 |                                                                                       |                                                                                       |
| ... p53shRNA 1 | 556.6 ± 87.2 / > 5000                                       | 2.2                                                                                   | > 7.4                                                                                 |
| ... scr 2      | 235.8 ± 18.1 / 723.6 ± 69.6                                 | 0.9                                                                                   | 1.1                                                                                   |
| NB-S-124       | 75.2 ± 20.2 / 159.5 ± 8.4                                   |                                                                                       |                                                                                       |
| ... p53shRNA 1 | 515.1 ± 104.0 / 4889 ± 225                                  | 6.8                                                                                   | 30.7                                                                                  |
| ... scr 2      | 74.4 ± 8.4 / 140.6 ± 10.1                                   | 1.0                                                                                   | 0.9                                                                                   |
| SH-SY5Y        | 166.8 ± 14.6 / 479.7 ± 58.6                                 |                                                                                       |                                                                                       |
| ... p53shRNA 1 | 323.0 ± 28.2 / 2501 ± 396                                   | 1.9                                                                                   | 5.2                                                                                   |
| ... scr 2      | 205.1 ± 44.3 / 489.8 ± 70.5                                 | 1.2                                                                                   | 1.0                                                                                   |
| UKF-NB-2       | 128.0 ± 22.3 / 283.4 ± 35.1                                 |                                                                                       |                                                                                       |
| ... p53shRNA 1 | 247.1 ± 26.4 / 837.9 ± 101.2                                | 1.9                                                                                   | 3.0                                                                                   |
| ... scr 2      | 141.1 ± 12.6 / 362.5 ± 69.2                                 | 1.1                                                                                   | 1.3                                                                                   |
| UKF-NB-3       | 48.0 ± 7.9 / 85.8 ± 6.5                                     |                                                                                       |                                                                                       |
| ... p53shRNA 1 | 174.2 ± 22.7 / 4338 ± 527                                   | 3.6                                                                                   | 50.6                                                                                  |
| ... scr 2      | 56.3 ± 4.1 / 95.6 ± 10.2                                    | 1.2                                                                                   | 1.1                                                                                   |

<sup>1</sup> p53-depleted, i.e. transduced with a lentiviral vector expressing p53shRNA

<sup>2</sup> vector control, i.e. transduced with the vector expressing scrambled, non-targeting shRNA

**Suppl. Table S6.** Effects of flubendazole and the MDM2 antagonist nutlin-3 on neuroblastoma cell viability (% non-treated control).

|                                           | nutlin-3 (1.25 $\mu$ M) |                   | nutlin-3 (0.625 $\mu$ M) |                   |                   |
|-------------------------------------------|-------------------------|-------------------|--------------------------|-------------------|-------------------|
|                                           | flubendazole            | + flubendazole    | + flubendazole           |                   |                   |
| flubendazole 80nM                         |                         |                   |                          |                   |                   |
| UKF-NB-3                                  | 21.91 $\pm$ 1.42        | 60.51 $\pm$ 16.07 | 0                        | 72.60 $\pm$ 3.53  | 0                 |
| UKF-NB-3 <sup>fVCR</sup> <sup>10</sup>    | 93.04 $\pm$ 2.23        | 78.23 $\pm$ 10.10 | 88.84 $\pm$ 3.96         | 77.56 $\pm$ 16.45 | 94.75 $\pm$ 13.80 |
| UKF-NB-3 <sup>scr</sup> <sup>1</sup>      | 18.81 $\pm$ 2.06        | 51.97 $\pm$ 15.50 | 0                        | 71.03 $\pm$ 6.22  | 0                 |
| UKF-NB-3 <sup>p53shRNA</sup> <sup>2</sup> | 97.99 $\pm$ 3.62        | 81.54 $\pm$ 8.61  | 66.22 $\pm$ 2.57         | 92.00 $\pm$ 10.09 | 78.82 $\pm$ 11.35 |
| flubendazole 40nM                         |                         |                   |                          |                   |                   |
| UKF-NB-3                                  | 60.80 $\pm$ 13.48       | 60.51 $\pm$ 16.07 | 6.76 $\pm$ 2.23          | 72.60 $\pm$ 3.53  | 29.96 $\pm$ 6.26  |
| UKF-NB-3 <sup>fVCR</sup> <sup>10</sup>    | 88.46 $\pm$ 9.93        | 78.23 $\pm$ 10.10 | 89.02 $\pm$ 17.54        | 77.56 $\pm$ 16.45 | 87.52 $\pm$ 2.01  |
| UKF-NB-3 <sup>scr</sup>                   | 73.93 $\pm$ 11.65       | 51.97 $\pm$ 15.50 | 17.63 $\pm$ 0.77         | 71.03 $\pm$ 6.22  | 35.37 $\pm$ 11.44 |
| UKF-NB-3 <sup>p53shRNA</sup>              | 104.55 $\pm$ 3.02       | 81.54 $\pm$ 8.61  | 78.93 $\pm$ 2.60         | 92.00 $\pm$ 10.09 | 90.22 $\pm$ 3.69  |

<sup>1</sup> UKF-NB-3 cells transduced with a control vector <sup>2</sup> UKF-NB-3 transduced with a lentiviral vector expressing p53 shRNA

**Suppl. Table S7.** Anti-cancer effects of flubendazole dissolved in DMSO or as (2-hydroxypropyl)- $\beta$ -cyclodextrin (CD) preparation. Concentrations that reduce cell viability by 50% ( $IC_{50}$ ) were determined by MTT assay after a five day treatment period.

| Cell line | $IC_{50}$ (nM)<br>flubendazole |                                                  |                  |
|-----------|--------------------------------|--------------------------------------------------|------------------|
|           | DMSO                           | (2-hydroxypropyl)- $\beta$ -cyclodextrin complex |                  |
|           |                                | freshly prepared                                 | after 8 weeks    |
| UKF-NB-3  | 48.0 $\pm$ 7.9                 | 56.29 $\pm$ 11.37                                | 53.33 $\pm$ 9.07 |

**Suppl. Table S8.** Flubendazole or mebendazole concentrations that inhibit viability of the investigated cell lines by 50% (IC<sub>50</sub>) as indicated by MTT assay after a five day incubation period.

| Cell line            | IC <sub>50</sub> (nM) |              |
|----------------------|-----------------------|--------------|
|                      | flubendazole          | mebendazole  |
| Colorectal carcinoma |                       |              |
| HT29                 | 272.7 ± 10.1          | 433.3 ± 10.3 |
| LoVo                 | 352.6 ± 21.0          | 304.0 ± 25.3 |
| RKO                  | 252.1 ± 9.4           | 191.6 ± 6.0  |
| Ewing's sarcoma      |                       |              |
| A673                 | 399.5 ± 15.3          | 323.5 ± 20.4 |
| RD-ES                | 473.9 ± 18.0          | 417.6 ± 17.4 |
| Glioma               |                       |              |
| G62                  | 355.3 ± 13.6          | 289.8 ± 14.6 |
| GMS-10               | 582.3 ± 20.7          | 565.8 ± 25.1 |
| LN229                | 363.0 ± 31.9          | 432.4 ± 38.1 |
| U138MG               | > 5,000               | > 5,000      |
| Hepatoma             |                       |              |
| HepG2                | 362.7 ± 19.3          | 343.1 ± 8.8  |
| Leukaemia/lymphoma   |                       |              |
| JURKAT               | 123.3 ± 10.5          | 112.2 ± 10.6 |
| L-428                | 178.9 ± 23.2          | 128.6 ± 21.9 |

Lung carcinoma

|         |              |              |
|---------|--------------|--------------|
| HCC-44  | 208.8 ± 20.4 | 149.7 ± 7.1  |
| HCC-827 | 225.1 ± 25.6 | 176.0 ± 16.2 |

Medulloblastoma

|           |              |              |
|-----------|--------------|--------------|
| D283Med   | 121.6 ± 9.3  | 104.0 ± 12.9 |
| Daoy      | 176.6 ± 13.1 | 160.1 ± 24.8 |
| MHH-Med-1 | 445.0 ± 32.2 | 452.7 ± 15.1 |

Melanoma

|           |                |              |
|-----------|----------------|--------------|
| Colo-679  | 477.2 ± 33.4   | 447.6 ± 36.5 |
| IGR-39    | 317.4 ± 14.2   | 270.6 ± 20.8 |
| MelHO     | 422.3 ± 30.1   | 358.8 ± 11.9 |
| MelJuso   | 1849.4 ± 278.6 | > 5,000      |
| MeWo      | 381.5 ± 39.2   | 340.0 ± 32.1 |
| RVH-421   | 614.1 ± 48.6   | 604.2 ± 45.6 |
| SK-Mel-30 | 490.8 ± 20.6   | 403.6 ± 19.3 |

Neuroblastoma

|          |              |              |
|----------|--------------|--------------|
| IMR-32   | 97.2 ± 42.8  | 122.8 ± 12.8 |
| SH-SY5Y  | 166.8 ± 14.6 | 152.5 ± 14.5 |
| UKF-NB-2 | 128.0 ± 22.3 | 142.7 ± 16.6 |
| UKF-NB-3 | 48.0 ± 7.9   | 40.8 ± 6.1   |
| UKF-NB-6 | 207.3 ± 19.3 | 224.0 ± 22.6 |

Prostate carcinoma

|       |              |              |
|-------|--------------|--------------|
| 22RV1 | 560.1 ± 59.5 | 395.9 ± 46.1 |
| DU145 | 666.1 ± 62.3 | 562.7 ± 81.8 |



|                      |               |               |
|----------------------|---------------|---------------|
| LNCaP                | 395.6 ± 48.19 | 293.7 ± 62.0  |
| PC-3                 | 372.3 ± 38.1  | 332.5 ± 33.3  |
| Rhabdomyosarcoma     |               |               |
| KFR                  | 870.3 ± 77.8  | 1149.3 ± 58.8 |
| Rh30                 | 483.4 ± 21.8  | 361.4 ± 24.0  |
| Thyroid carcinoma    |               |               |
| 8505C                | 530.7 ± 58.3  | 377.5 ± 49.4  |
| Urothelial carcinoma |               |               |
| HT-1376              | 604.5 ± 71.8  | 600.9 ± 28.4  |
| RT112                | 373.6 ± 39.9  | 345.1 ± 35.8  |

---

**Suppl. Table S9.** Sensitivity of parental neuroblastoma cells and their drug-adapted sub-lines to flubendazole or mebendazole as indicated by the concentration that reduces cell viability by 50% (IC<sub>50</sub>) indicated by MTT assay after a five day treatment period and ratios flubendazole or mebendazole IC<sub>50</sub>s drug-adapted sub-lines/parental cell lines.

| Cell line                             | IC <sub>50</sub> (nM)<br>flubendazole | IC <sub>50</sub> flubendazole<br>drug-adapted<br>sub-line/<br>parental<br>cell line | IC <sub>50</sub> (nM)<br>mebendazole | IC <sub>50</sub> mebendazole<br>drug-adapted<br>sub-line/<br>parental<br>cell line |
|---------------------------------------|---------------------------------------|-------------------------------------------------------------------------------------|--------------------------------------|------------------------------------------------------------------------------------|
| IMR-32                                | 97.2 ± 42.8                           |                                                                                     | 122.8 ± 12.8                         |                                                                                    |
| ... <sup>r</sup> DOX <sup>20</sup>    | 313.2 ± 11.7                          | 3.2                                                                                 | 272.8 ± 33.2                         | 2.2                                                                                |
| ... <sup>r</sup> ETO <sup>100</sup>   | 237.3 ± 18.8                          | 2.4                                                                                 | 165.7 ± 13.2                         | 1.3                                                                                |
| ... <sup>r</sup> MEL <sup>500</sup>   | 126.6 ± 11.1                          | 1.3                                                                                 | 120.8 ± 12.2                         | 1.0                                                                                |
| ... <sup>r</sup> TOPO <sup>8</sup>    | 105.5 ± 15.7                          | 1.1                                                                                 | 92.7 ± 18.4                          | 0.8                                                                                |
| ... <sup>r</sup> VCR <sup>10</sup>    | 317.8 ± 32.0                          | 3.3                                                                                 | 278.1 ± 14.5                         | 2.3                                                                                |
| UKF-NB-2                              | 128.0 ± 22.3                          |                                                                                     | 142.7 ± 16.6                         |                                                                                    |
| ... <sup>r</sup> CDDP <sup>1000</sup> | 115.5 ± 14.3                          | 0.9                                                                                 | 92.3 ± 8.6                           | 0.6                                                                                |
| ... <sup>r</sup> DOX <sup>20</sup>    | 422.0 ± 27.7                          | 3.3                                                                                 | 383.7 ± 30.0                         | 2.7                                                                                |
| ... <sup>r</sup> ETO <sup>40</sup>    | 56.7 ± 9.6                            | 0.4                                                                                 | 119.4 ± 13.9                         | 0.8                                                                                |
| ... <sup>r</sup> MEL <sup>600</sup>   | 214.2 ± 17.1                          | 1.7                                                                                 | 181.5 ± 18.5                         | 1.3                                                                                |
| ... <sup>r</sup> TOPO <sup>10</sup>   | 161.3 ± 14.5                          | 1.3                                                                                 | 158.6 ± 15.3                         | 1.1                                                                                |
| ... <sup>r</sup> VCR <sup>10</sup>    | 162.4 ± 15.8                          | 1.3                                                                                 | 176.8 ± 20.4                         | 1.2                                                                                |
| UKF-NB-3                              | 48.0 ± 7.9                            |                                                                                     | 40.8 ± 6.1                           |                                                                                    |
| ... <sup>r</sup> CDDP <sup>1000</sup> | 78.9 ± 5.6                            | 1.6                                                                                 | 60.7 ± 5.4                           | 1.5                                                                                |
| ... <sup>r</sup> ETO <sup>200</sup>   | 252.5 ± 33.9                          | 5.3                                                                                 | 169.9 ± 16.4                         | 4.2                                                                                |
| ... <sup>r</sup> MEL <sup>2000</sup>  | 196.0 ± 14.7                          | 4.1                                                                                 | 152.1 ± 13.0                         | 3.7                                                                                |
| ... <sup>r</sup> PCL <sup>20</sup>    | 93.4 ± 8.0                            | 1.9                                                                                 | 67.1 ± 11.6                          | 1.6                                                                                |

|                          |              |     |              |     |
|--------------------------|--------------|-----|--------------|-----|
| ...rVCR <sup>10</sup>    | 214.1 ± 21.4 | 4.5 | 168.8 ± 9.1  | 4.1 |
| ...rVINB <sup>10</sup>   | 163.3 ± 20.8 | 3.4 | 166.4 ± 15.9 | 4.1 |
| ...rVINOR <sup>20</sup>  | 364.5 ± 28.6 | 7.6 | 304.2 ± 25.9 | 7.5 |
| UKF-NB-6                 | 207.3 ± 19.3 |     | 224.0 ± 22.6 |     |
| ...rCDDP <sup>1000</sup> | 219.2 ± 10.0 | 1.1 | 245.0 ± 25.8 | 1.1 |
| ...rDOX <sup>20</sup>    | 214.2 ± 19.4 | 1.0 | 211.7 ± 23.1 | 0.9 |
| ...rETO <sup>200</sup>   | 233.2 ± 30.0 | 1.1 | 255.9 ± 30.1 | 1.1 |
| ...rMEL <sup>2000</sup>  | 275.5 ± 17.1 | 1.3 | 253.0 ± 22.9 | 1.1 |
| ...rPCL <sup>20</sup>    | 105.8 ± 17.9 | 0.5 | 166.2 ± 15.9 | 0.7 |
| ...rTOPO <sup>20</sup>   | 177.5 ± 18.2 | 0.9 | 180.8 ± 17.8 | 0.8 |
| ...rVCR <sup>10</sup>    | 435.3 ± 63.8 | 2.1 | 415.3 ± 47.0 | 1.9 |

---

**Suppl. Table S10.** Drug concentrations that inhibit the viability of parental cancer cell lines and their drug-adapted sub-lines by 50% (IC<sub>50</sub>) as indicated by MTT assay after 5 day incubation.

|                                          |                              |
|------------------------------------------|------------------------------|
| Cell line                                | IC <sub>50</sub> cisplatin   |
| GI-ME-N                                  | 47.1 ± 8.4 ng/mL             |
| GI-ME-N <sup>r</sup> CDDP <sup>500</sup> | 1384 ± 181 ng/mL             |
| Cell line                                | IC <sub>50</sub> doxorubicin |
| GI-ME-N                                  | 0.81 ± 0.19 ng/mL            |
| GI-ME-N <sup>r</sup> DOX <sup>5</sup>    | 10.11 ± 2.2 ng/mL            |
| Cell line                                | IC <sub>50</sub> vincristine |
| GI-ME-N                                  | 0.06 ± 0.01 ng/mL            |
| GI-ME-N <sup>r</sup> VCR <sup>14</sup>   | 42.19 ± 9.03 ng/mL           |
| Cell line                                | IC <sub>50</sub> carboplatin |
| IMR-5                                    | 914.63 ± 45.92 ng/mL         |
| IMR-5 <sup>r</sup> CARBO <sup>5000</sup> | 5484 ± 424 ng/mL             |
| Cell line                                | IC <sub>50</sub> cisplatin   |
| IMR-5                                    | 158.00 ± 5.25 ng/mL          |
| IMR-5 <sup>r</sup> CDDP <sup>1000</sup>  | 1214 ± 170 ng/mL             |
| Cell line                                | IC <sub>50</sub> dacarbazine |
| IMR-5                                    | 17.83 µg/mL                  |
| IMR-5 <sup>r</sup> DACARB <sup>20</sup>  | 73.67 µg/mL                  |
| Cell line                                | IC <sub>50</sub> docetaxel   |
| IMR-5                                    | 0.70 ± 0.02 ng/mL            |
| IMR-5 <sup>r</sup> DOCE <sup>20</sup>    | 59.41 ± 4.18 ng/mL           |
| Cell line                                | IC <sub>50</sub> doxorubicin |
| IMR-5                                    | 6.76 ± 1.53 ng/mL            |
| IMR-5 <sup>r</sup> DOX <sup>20</sup>     | 365.18 ± 50.97 ng/mL         |
| Cell line                                | IC <sub>50</sub> etoposide   |
| IMR-5                                    | 22.13 ± 1.16 ng/mL           |
| IMR-5 <sup>r</sup> ETO <sup>100</sup>    | 278.63 ± 19.75 ng/mL         |
| Cell line                                | IC <sub>50</sub> gemcitabine |
| IMR-5                                    | 3.34 ± 0.41 ng/mL            |
| IMR-5 <sup>r</sup> GEMCI <sup>20</sup>   | 53.31 ± 6.31 ng/mL           |
| Cell line                                | IC <sub>50</sub> irinotecan  |
| IMR-5                                    | 342.78 ± 61.27 ng/mL         |
| IMR-5 <sup>r</sup> IRINO <sup>1000</sup> | 39,224 ± 5,618 ng/mL         |
| Cell line                                | IC <sub>50</sub> melphalan   |

|                                           |                              |
|-------------------------------------------|------------------------------|
| IMR-5                                     | 915.80 ± 66.63 ng/mL         |
| IMR-5 <sup>r</sup> MEL <sup>3000</sup>    | 8453.53 ± 184.97 ng/mL       |
|                                           |                              |
| Cell line                                 | IC <sub>50</sub> oxaliplatin |
| IMR-5                                     | 552.25 ± 23.15 ng/mL         |
| IMR-5 <sup>r</sup> OXALI <sup>4000</sup>  | 5495 ± 143 ng/mL             |
|                                           |                              |
| Cell line                                 | IC <sub>50</sub> paclitaxel  |
| IMR-5                                     | 0.77 ± 0.04 ng/mL            |
| IMR-5 <sup>r</sup> PCL <sup>20</sup>      | 42.61 ± 14.94 ng/mL          |
|                                           |                              |
| Cell line                                 | IC <sub>50</sub> topotecan   |
| IMR-5                                     | 0.83 ± 0.15 ng/mL            |
| IMR-5 <sup>r</sup> TOPO <sup>20</sup>     | 98.50 ± 20.27 ng/mL          |
|                                           |                              |
| Cell line                                 | IC <sub>50</sub> vincristine |
| IMR-5                                     | 0.46 ± 0.04 ng/mL            |
| IMR-5 <sup>r</sup> VCR <sup>10</sup>      | 31.41 ± 2.69 ng/mL           |
|                                           |                              |
| Cell line                                 | IC <sub>50</sub> vinblastine |
| IMR-5                                     | 1.32 ± 0.26 ng/mL            |
| IMR-5 <sup>r</sup> VINB <sup>20</sup>     | 39.40 ± 6.67 ng/mL           |
|                                           |                              |
| Cell line                                 | IC <sub>50</sub> vinorelbine |
| IMR-5                                     | 3.48 ± 0.52 ng/mL            |
| IMR-5 <sup>r</sup> VINOR <sup>20</sup>    | 25.54 ± 4.16 ng/mL           |
|                                           |                              |
| Cell line                                 | IC <sub>50</sub> bortezomib  |
| IMR-32                                    | 0.78 ± 0.20 nM               |
| IMR-32 <sup>r</sup> BORTE <sup>10</sup>   | 18.16 ± 2.05 nM              |
|                                           |                              |
| Cell line                                 | IC <sub>50</sub> carboplatin |
| IMR-32                                    | 641.87 ± 144.44 ng/mL        |
| IMR-32 <sup>r</sup> CARBO <sup>4000</sup> | 11158 ± 3617 ng/mL           |
|                                           |                              |
| Cell line                                 | IC <sub>50</sub> cisplatin   |
| IMR-32                                    | 190.40 ± 27.66 ng/mL         |
| IMR-32 <sup>r</sup> CDDP <sup>1000</sup>  | 3998 ± 106 ng/mL             |
|                                           |                              |
| Cell line                                 | IC <sub>50</sub> doxorubicin |
| IMR-32                                    | 4.18 ± 2.14 ng/mL            |
| IMR-32 <sup>r</sup> DOX <sup>20</sup>     | 58.15 ± 3.54 ng/mL           |
|                                           |                              |
| Cell line                                 | IC <sub>50</sub> etoposide   |
| IMR-32                                    | 39.18 ± 5.93 ng/mL           |
| IMR-32 <sup>r</sup> ETO <sup>100</sup>    | 245 ± 28 ng/mL               |
|                                           |                              |
| Cell line                                 | IC <sub>50</sub> gemcitabine |
| IMR-32                                    | 2.48 ± 0.37 ng/mL            |

|                                           |                              |
|-------------------------------------------|------------------------------|
| IMR-32 <sup>r</sup> GEMCI <sup>25</sup>   | 67.03 ± 12.51 ng/mL          |
| Cell line                                 | IC <sub>50</sub> melphalan   |
| IMR-32                                    | 242 ± 45 ng/mL               |
| IMR-32 <sup>r</sup> MEL <sup>500</sup>    | 1169 ± 125 ng/mL             |
| Cell line                                 | IC <sub>50</sub> oxaliplatin |
| IMR-32                                    | 944.20 ± 45.61 ng/mL         |
| IMR-32 <sup>r</sup> OXALI <sup>4000</sup> | 5673 ± 530 ng/mL             |
| Cell line                                 | IC <sub>50</sub> topotecan   |
| IMR-32                                    | 1.77 ± 0.27 ng/mL            |
| IMR-32 <sup>r</sup> TOPO <sup>8</sup>     | 22.79 ± 5.55 ng/mL           |
| Cell line                                 | IC <sub>50</sub> vincristine |
| IMR-32                                    | 0.28 ± 0.07 ng/mL            |
| IMR-32 <sup>r</sup> VCR <sup>10</sup>     | 29.55 ± 3.79 ng/mL           |
| Cell line                                 | IC <sub>50</sub> vinorelbine |
| IMR-32                                    | 0.37 ± 0.02 ng/mL            |
| IMR-32 <sup>r</sup> VINOR <sup>5</sup>    | 6.94 ± 0.70 ng/mL            |
| Cell line                                 | IC <sub>50</sub> bortezomib  |
| NGP                                       | 3.83 ± 0.49 nM               |
| NGP <sup>r</sup> BORTE <sup>20</sup>      | 28.83 ± 6.94 nM              |
| Cell line                                 | IC <sub>50</sub> carboplatin |
| NGP                                       | 716 ± 105 ng/mL              |
| NGP <sup>r</sup> CARBO <sup>2000</sup>    | 2402 ± 366 ng/mL             |
| Cell line                                 | IC <sub>50</sub> cisplatin   |
| NGP                                       | 179.2 ± 26.6 ng/mL           |
| NGP <sup>r</sup> CDDP <sup>1000</sup>     | 2016 ± 327 ng/mL             |
| Cell line                                 | IC <sub>50</sub> dacarbazine |
| NGP                                       | 2.83 ± 0.43 µg/mL            |
| NGP <sup>r</sup> DACARB <sup>18</sup>     | 55.84 ± 10.46 µg/mL          |
| Cell line                                 | IC <sub>50</sub> docetaxel   |
| NGP                                       | 0.011 ± 0.006 ng/mL          |
| NGP <sup>r</sup> DOCE <sup>20</sup>       | 103.2 ± 15.8 ng/mL           |
| Cell line                                 | IC <sub>50</sub> doxorubicin |
| NGP                                       | 7.56 ± 1.07 ng/mL            |
| NGP <sup>r</sup> DOX <sup>20</sup>        | 160.2 ± 24.8 ng/mL           |
| Cell line                                 | IC <sub>50</sub> etoposide   |
| NGP                                       | 48.31 ± 7.02 ng/mL           |
| NGP <sup>r</sup> ETO <sup>200</sup>       | 281.37 ± 39.16 ng/mL         |

|                                        |                              |
|----------------------------------------|------------------------------|
| Cell line                              | IC <sub>50</sub> gemcitabine |
| NGP                                    | 0.045 ± 0.023 ng/mL          |
| NGP <sup>r</sup> GEMCI <sup>20</sup>   | 573.9 ± 162.2 ng/mL          |
| Cell line                              | IC <sub>50</sub> irinotecan  |
| NGP                                    | 229.89 ± 34.82 ng/mL         |
| NGP <sup>r</sup> IRINO <sup>1000</sup> | 2520 ± 367 ng/mL             |
| Cell line                              | IC <sub>50</sub> melphalan   |
| NGP                                    | 430.6 ± 82.5 ng/mL           |
| NGP <sup>r</sup> MEL <sup>2000</sup>   | 2557 ± 308 ng/mL             |
| Cell line                              | IC <sub>50</sub> oxaliplatin |
| NGP                                    | 524.1 ± 88.3 ng/mL           |
| NGP <sup>r</sup> OXALI <sup>4000</sup> | 5136 ± 781 ng/mL             |
| Cell line                              | IC <sub>50</sub> paclitaxel  |
| NGP                                    | 0.41 ± 0.08 ng/mL            |
| NGP <sup>r</sup> PCL <sup>20</sup>     | 37.83 ± 5.26 ng/mL           |
| Cell line                              | IC <sub>50</sub> topotecan   |
| NGP                                    | 1.82 ± 0.30 ng/mL            |
| NGP <sup>r</sup> TOPO <sup>20</sup>    | 1022 ± 237 ng/mL             |
| Cell line                              | IC <sub>50</sub> vincristine |
| NGP                                    | 47.6 ± 3.9 ng/mL             |
| NGP <sup>r</sup> VCR <sup>100</sup>    | 187.6 ± 87.7 ng/mL           |
| Cell line                              | IC <sub>50</sub> vinblastine |
| NGP                                    | 0.07 ± 0.02 ng/mL            |
| NGP <sup>r</sup> VINB <sup>20</sup>    | 20.81 ± 4.26 ng/mL           |
| Cell line                              | IC <sub>50</sub> vinorelbine |
| NGP                                    | 0.43 ± 0.07 ng/mL            |
| NGP <sup>r</sup> VINOR <sup>20</sup>   | 28.2 ± 3.7 ng/mL             |
| Cell line                              | IC <sub>50</sub> carboplatin |
| NLF                                    | 1533 ± 196 ng/mL             |
| NLF <sup>r</sup> CARBO <sup>5000</sup> | 7001 ± 568 ng/mL             |
| Cell line                              | IC <sub>50</sub> cisplatin   |
| NLF                                    | 228.3 ± 18.5 ng/mL           |
| NLF <sup>r</sup> CDDP <sup>1000</sup>  | 2204 ± 281 ng/mL             |
| Cell line                              | IC <sub>50</sub> dacarbazine |
| NLF                                    | 13.75 ± 1.60 µg/mL           |
| NLF <sup>r</sup> DACARB <sup>20</sup>  | 39.26 ± 4.74 µg/mL           |

|                                        |                              |
|----------------------------------------|------------------------------|
| Cell line                              | IC <sub>50</sub> docetaxel   |
| NLF                                    | 0.57 ± 0.06 ng/mL            |
| NLF <sup>r</sup> DOCE <sup>20</sup>    | 69.77 ± 8.07 ng/mL           |
| Cell line                              | IC <sub>50</sub> doxorubicin |
| NLF                                    | 10.74 ± 1.03 ng/mL           |
| NLF <sup>r</sup> DOX <sup>40</sup>     | 83.91 ± 16.83 ng/mL          |
| Cell line                              | IC <sub>50</sub> etoposide   |
| NLF                                    | 47.90 ± 5.16 ng/mL           |
| NLF <sup>r</sup> ETO <sup>100</sup>    | 210.81 ± 2.35 ng/mL          |
| Cell line                              | IC <sub>50</sub> gemcitabine |
| NLF                                    | 0.73 ± 0.05 ng/mL            |
| NLF <sup>r</sup> GEMCI <sup>20</sup>   | 76.38 ± 9.48 ng/mL           |
| Cell line                              | IC <sub>50</sub> irinotecan  |
| NLF                                    | 149.3 ± 19.5 ng/mL           |
| NLF <sup>r</sup> IRINO <sup>1000</sup> | 2861 ± 331 ng/mL             |
| Cell line                              | IC <sub>50</sub> melphalan   |
| NLF                                    | 259.5 ± 20.8 ng/mL           |
| NLF <sup>r</sup> MEL <sup>3000</sup>   | 1260 ± 149 ng/mL             |
| Cell line                              | IC <sub>50</sub> oxaliplatin |
| NLF                                    | 3296 ± 399 ng/mL             |
| NLF <sup>r</sup> OXALI <sup>4000</sup> | 11862 ± 982 ng/mL            |
| Cell line                              | IC <sub>50</sub> paclitaxel  |
| NLF                                    | 0.73 ± 0.11 ng/mL            |
| NLF <sup>r</sup> PCL <sup>20</sup>     | 27.60 ± 3.42 ng/mL           |
| Cell line                              | IC <sub>50</sub> topotecan   |
| NLF                                    | 1.12 ± 0.15 ng/mL            |
| NLF <sup>r</sup> TOPO <sup>10</sup>    | 14.14 ± 1.39 ng/mL           |
| Cell line                              | IC <sub>50</sub> vincristine |
| NLF                                    | 0.017 ± 0.006 ng/mL          |
| NLF <sup>r</sup> VCR <sup>5</sup>      | 7.39 ± 0.28 ng/mL            |
| Cell line                              | IC <sub>50</sub> vinblastine |
| NLF                                    | 0.27 ± 0.04 ng/mL            |
| NLF <sup>r</sup> VINB <sup>10</sup>    | 18.27 ± 2.43 ng/mL           |
| Cell line                              | IC <sub>50</sub> vinorelbine |
| NLF                                    | 0.067 ± 0.008 ng/mL          |
| NLF <sup>r</sup> VINOR <sup>10</sup>   | 4.61 ± 0.31 ng/mL            |
| Cell line                              | IC <sub>50</sub> cisplatin   |



|                                            |                              |
|--------------------------------------------|------------------------------|
| SHEP                                       | 188.5 ± 22.6 ng/mL           |
| SHEP <sup>r</sup> CDDP <sup>1000</sup>     | 1624 ± 182 ng/mL             |
|                                            |                              |
| Cell line                                  | IC <sub>50</sub> doxorubicin |
| SHEP                                       | 7.65 ± 0.91 ng/mL            |
| SHEP <sup>r</sup> DOX <sup>100</sup>       | 153.7 ± 19.2 ng/mL           |
|                                            |                              |
| Cell line                                  | IC <sub>50</sub> etoposide   |
| SHEP                                       | 40.60 ± 5.56 ng/mL           |
| SHEP <sup>r</sup> ETO <sup>100</sup>       | 258.4 ± 36.3 ng/mL           |
|                                            |                              |
| Cell line                                  | IC <sub>50</sub> vincristine |
| SHEP                                       | 0.15 ± 0.02 ng/mL            |
| SHEP <sup>r</sup> VCR <sup>1</sup>         | 1.17 ± 0.15 ng/mL            |
|                                            |                              |
| Cell line                                  | IC <sub>50</sub> cisplatin   |
| SH-SY5Y                                    | 59 ± 15 ng/mL                |
| SH-SY5Y <sup>r</sup> CDDP <sup>200</sup>   | 350 ± 41 ng/mL               |
|                                            |                              |
| Cell line                                  | IC <sub>50</sub> doxorubicin |
| SH-SY5Y                                    | 2.13 ± 0.28 ng/mL            |
| SH-SY5Y <sup>r</sup> DOX <sup>10</sup>     | 11.80 ± 1.06 ng/mL           |
|                                            |                              |
| Cell line                                  | IC <sub>50</sub> vincristine |
| SH-SY5Y                                    | 0.04 ± 0.01 ng/mL            |
| SH-SY5Y <sup>r</sup> VCR <sup>10</sup>     | 15.15 ± 2.02 ng/mL           |
|                                            |                              |
| Cell line                                  | IC <sub>50</sub> carboplatin |
| SK-N-AS                                    | 572.6 ± 65.8 ng/mL           |
| SK-N-AS <sup>r</sup> CARBO <sup>2000</sup> | 17211 ± 2403 ng/mL           |
|                                            |                              |
| Cell line                                  | IC <sub>50</sub> cisplatin   |
| SK-N-AS                                    | 60.1 ± 8.6 ng/mL             |
| SK-N-AS <sup>r</sup> CDDP <sup>500</sup>   | 2877 ± 331 ng/mL             |
|                                            |                              |
| Cell line                                  | IC <sub>50</sub> dacarbazine |
| SK-N-AS                                    | 9.47 ± 1.13 µg/mL            |
| SK-N-AS <sup>r</sup> DACARB <sup>16</sup>  | 86.17 ± 11.25 µg/mL          |
|                                            |                              |
| Cell line                                  | IC <sub>50</sub> docetaxel   |
| SK-N-AS                                    | 0.05 ± 0.01 ng/mL            |
| SK-N-AS <sup>r</sup> DOCE <sup>10</sup>    | 24.14 ± 4.07 ng/mL           |
|                                            |                              |
| Cell line                                  | IC <sub>50</sub> doxorubicin |
| SK-N-AS                                    | 6.32 ± 0.82 ng/mL            |
| SK-N-AS <sup>r</sup> DOX <sup>10</sup>     | 15.52 ± 1.97 ng/mL           |
|                                            |                              |
| Cell line                                  | IC <sub>50</sub> etoposide   |
| SK-N-AS                                    | 191.6 ± 24.9 ng/mL           |

|                                             |                              |
|---------------------------------------------|------------------------------|
| SK-N-AS <sup>r</sup> ETO <sup>200</sup>     | 851.1 ± 144.3 ng/mL          |
| Cell line                                   | IC <sub>50</sub> gemcitabine |
| SK-N-AS                                     | 0.24 ± 0.04 ng/mL            |
| SK-N-AS <sup>r</sup> GEMCI <sup>10</sup>    | 11.10 ± 1.34 ng/mL           |
| Cell line                                   | IC <sub>50</sub> irinotecan  |
| SK-N-AS                                     | 52.69 ± 6.13 ng/mL           |
| SK-N-AS <sup>r</sup> IRINO <sup>500</sup>   | 525.3 ± 64.9 ng/mL           |
| Cell line                                   | IC <sub>50</sub> melphalan   |
| SK-N-AS                                     | 547.1 ± 89.2 ng/mL           |
| SK-N-AS <sup>r</sup> MEL <sup>1000</sup>    | 1015 ± 152 ng/mL             |
| Cell line                                   | IC <sub>50</sub> oxaliplatin |
| SK-N-AS                                     | 657.2 ± 86.3 ng/mL           |
| SK-N-AS <sup>r</sup> OXALI <sup>4000</sup>  | 6939 ± 795 ng/mL             |
| Cell line                                   | IC <sub>50</sub> paclitaxel  |
| SK-N-AS                                     | 1.00 ± 0.17 ng/mL            |
| SK-N-AS <sup>r</sup> PCL <sup>20</sup>      | 84.04 ± 12.7 ng/mL           |
| Cell line                                   | IC <sub>50</sub> topotecan   |
| SK-N-AS                                     | 0.69 ± 0.15 ng/mL            |
| SK-N-AS <sup>r</sup> TOPO <sup>20</sup>     | 28.92 ± 3.24 ng/mL           |
| Cell line                                   | IC <sub>50</sub> vincristine |
| SK-N-AS                                     | 0.17 ± 0.03 ng/mL            |
| SK-N-AS <sup>r</sup> VCR <sup>20</sup>      | 23.75 ± 2.98 ng/mL           |
| Cell line                                   | IC <sub>50</sub> vinblastine |
| SK-N-AS                                     | 0.020 ± 0.005 ng/mL          |
| SK-N-AS <sup>r</sup> VINB <sup>10</sup>     | 35.03 ± 7.51 ng/mL           |
| Cell line                                   | IC <sub>50</sub> vinorelbine |
| SK-N-AS                                     | 0.04 ± 0.01 ng/mL            |
| SK-N-AS <sup>r</sup> VINOR <sup>20</sup>    | 16.55 ± 4.85 ng/mL           |
| Cell line                                   | IC <sub>50</sub> cisplatin   |
| UKF-NB-1                                    | 181.9 ± 15.4 ng/mL           |
| UKF-NB-1 <sup>r</sup> CDDP <sup>1000</sup>  | 1562 ± 179 ng/mL             |
| Cell line                                   | IC <sub>50</sub> vincristine |
| UKF-NB-1                                    | 5.09 ± 0.42 ng/mL            |
| UKF-NB-1 <sup>r</sup> VCR <sup>10</sup>     | 24.36 ± 2.83 ng/mL           |
| Cell line                                   | IC <sub>50</sub> carboplatin |
| UKF-NB-2                                    | 919.66 ± 17.83 ng/mL         |
| UKF-NB-2 <sup>r</sup> CARBO <sup>2000</sup> | 8191 ± 126 ng/mL             |

|                                              |                              |
|----------------------------------------------|------------------------------|
| Cell line                                    | IC <sub>50</sub> cisplatin   |
| UKF-NB-2                                     | 149 ± 18 ng/mL               |
| UKF-NB-2 <sup>r</sup> CDDP <sup>1000</sup>   | 2586 ± 207 ng/mL             |
| Cell line                                    | IC <sub>50</sub> dacarbazine |
| UKF-NB-2                                     | 1.05 ± 0.18 µg/mL            |
| UKF-NB-2 <sup>r</sup> DACARB <sup>4</sup>    | 38.86 ± 5.88 µg/mL           |
| Cell line                                    | IC <sub>50</sub> docetaxel   |
| UKF-NB-2                                     | 2.20 ± 0.11 ng/mL            |
| UKF-NB-2 <sup>r</sup> DOCE <sup>10</sup>     | 32.91 ± 1.47 ng/mL           |
| Cell line                                    | IC <sub>50</sub> doxorubicin |
| UKF-NB-2                                     | 7.36 ± 0.80 ng/mL            |
| UKF-NB-2 <sup>r</sup> DOX <sup>20</sup>      | 351 ± 40 ng/mL               |
| Cell line                                    | IC <sub>50</sub> etoposide   |
| UKF-NB-2                                     | 44.72 ± 7.41 ng/mL           |
| UKF-NB-2 <sup>r</sup> ETO <sup>400</sup>     | 1112 ± 73 ng/mL              |
| Cell line                                    | IC <sub>50</sub> irinotecan  |
| UKF-NB-2                                     | 232 ± 44 ng/mL               |
| UKF-NB-2 <sup>r</sup> IRINO <sup>400</sup>   | 2730 ± 366 ng/mL             |
| Cell line                                    | IC <sub>50</sub> melphalan   |
| UKF-NB-2                                     | 299 ± 56 ng/mL               |
| UKF-NB-2 <sup>r</sup> MEL <sup>600</sup>     | 8695 ± 856 ng/mL             |
| Cell line                                    | IC <sub>50</sub> nutlin-3    |
| UKF-NB-2                                     | 2.05 ± 0.33 µM               |
| UKF-NB-2 <sup>r</sup> Nutlin <sup>10µM</sup> | 21.03 ± 1.77 µM              |
| Cell line                                    | IC <sub>50</sub> oxaliplatin |
| UKF-NB-2                                     | 329.92 ± 16.71 ng/mL         |
| UKF-NB-2 <sup>r</sup> OXALI <sup>600</sup>   | 1187 ± 66 ng/mL              |
| Cell line                                    | IC <sub>50</sub> paclitaxel  |
| UKFNB-2                                      | 4.03 ± 0.15 ng/mL            |
| UKF-NB-2 <sup>r</sup> PCL <sup>20</sup>      | 182.41 ± 16.90 ng/mL         |
| Cell line                                    | IC <sub>50</sub> topotecan   |
| UKF-NB-2                                     | 1.63 ± 0.06 ng/mL            |
| UKF-NB-2 <sup>r</sup> TOPO <sup>10</sup>     | 40.71 ± 6.18 ng/mL           |
| Cell line                                    | IC <sub>50</sub> vincristine |
| UKF-NB-2                                     | 0.27 ± 0.04 ng/mL            |
| UKF-NB-2 <sup>r</sup> VCR <sup>10</sup>      | 78.01 ± 10.55 ng/mL          |

|                                             |                                     |
|---------------------------------------------|-------------------------------------|
| Cell line                                   | IC <sub>50</sub> vinblastine        |
| UKF-NB-2                                    | 0.81 ± 0.11 ng/mL                   |
| UKF-NB-2 <sup>r</sup> VINB <sup>10</sup>    | 40.10 ± 2.78 ng/mL                  |
| Cell line                                   | IC <sub>50</sub> vinorelbine        |
| UKF-NB-2                                    | 2.50 ± 0.09 ng/mL                   |
| UKF-NB-2 <sup>r</sup> VINOR <sup>10</sup>   | 45.45 ± 1.08 ng/mL                  |
| Cell line                                   | IC <sub>50</sub> bortezomib         |
| UKF-NB-3                                    | 3.22 ± 0.39 nM                      |
| UKF-NB-3 <sup>r</sup> BORTE <sup>20</sup>   | 48.91 ± 6.31 nM                     |
| Cell line                                   | IC <sub>50</sub> cabazitaxel        |
| UKF-NB-3                                    | 0.58 ± 0.03 ng/mL                   |
| UKF-NB-3 <sup>r</sup> CABAZI <sup>2</sup>   | 3.73 ± 0.45 ng/mL                   |
| Cell line                                   | IC <sub>50</sub> carboplatin        |
| UKF-NB-3                                    | 539.73 ± 89.40 ng/mL                |
| UKF-NB-3 <sup>r</sup> CARBO <sup>2000</sup> | 8600 ± 559 ng/mL                    |
| Cell line                                   | IC <sub>50</sub> cisplatin          |
| UKF-NB-3                                    | 60.14 ± 7.92 ng/mL                  |
| UKF-NB-3 <sup>r</sup> CDDP <sup>1000</sup>  | 2784 ± 99 ng/mL                     |
| Cell line                                   | IC <sub>50</sub> dacarbazine        |
| UKF-NB-3                                    | 3.60 ± 0.42 µg/mL                   |
| UKF-NB-3 <sup>r</sup> DACARB <sup>8</sup>   | 85.83 ± 10.11 µg/mL                 |
| Cell line                                   | IC <sub>50</sub> docetaxel          |
| UKF-NB-3                                    | 0.71 ± 0.21 ng/mL                   |
| UKF-NB-3 <sup>r</sup> DOCE <sup>20</sup>    | 34.89 ± 7.69 ng/mL                  |
| Cell line                                   | IC <sub>50</sub> doxorubicin        |
| UKF-NB-3                                    | 7.16 ± 2.35 ng/mL                   |
| UKF-NB-3 <sup>r</sup> DOX <sup>20</sup>     | 67.83 ± 14.73 ng/mL                 |
| Cell line                                   | IC <sub>50</sub> etoposide          |
| UKF-NB-3                                    | 27.14 ± 3.05 ng/mL                  |
| UKF-NB-3 <sup>r</sup> ETO <sup>200</sup>    | 140 ± 17 ng/mL                      |
| Cell line                                   | IC <sub>50</sub> gemcitabine        |
| UKF-NB-3                                    | 0.89 ± 0.17 ng/mL                   |
| UKF-NB-3 <sup>r</sup> GEMCI <sup>10</sup>   | 44.50 ± 7.18 ng/mL                  |
| Cell line                                   | IC <sub>50</sub> irinotecan         |
| UKF-NB-3                                    | 23.50 ± 2.72 ng/mL                  |
| UKF-NB-3 <sup>r</sup> IRINO <sup>800</sup>  | 1781 ± 163 ng/mL                    |
| Cell line                                   | IC <sub>50</sub> 2-methoxyestradiol |

|                                                 |                              |
|-------------------------------------------------|------------------------------|
| UKF-NB-3                                        | 143.2 ± 16.7 nM              |
| UKF-NB-3 <sup>r</sup> ME <sup>1000</sup>        | 1681 ± 178 nM                |
| Cell line                                       | IC <sub>50</sub> melphalan   |
| UKF-NB-3                                        | 83.74 ± 11.06 ng/mL          |
| UKF-NB-3 <sup>r</sup> MEL <sup>400</sup>        | 485 ± 58 ng/mL               |
| Cell line                                       | IC <sub>50</sub> nutlin-3    |
| UKF-NB-3                                        | 0.68 ± 0.09 μM               |
| UKF-NB-3 <sup>r</sup> Nutlin <sup>10μM</sup>    | 23.90 ± 2.53 μM              |
| Cell line                                       | IC <sub>50</sub> NVP-TAE684  |
| UKF-NB-3                                        | 62.3 ± 8.3 nM                |
| UKF-NB-3 <sup>r</sup> NVP-TAE684 <sup>500</sup> | 1315 ± 152 nM                |
| Cell line                                       | IC <sub>50</sub> oxaliplatin |
| UKF-NB-3                                        | 212.4 ± 5.11 ng/mL           |
| UKF-NB-3 <sup>r</sup> OXALI <sup>2000</sup>     | 3242 ± 343 ng/mL             |
| Cell line                                       | IC <sub>50</sub> paclitaxel  |
| UKF-NB-3                                        | 1.12 ± 0.15 ng/mL            |
| UKF-NB-3 <sup>r</sup> PCL <sup>20</sup>         | 145.65 ± 20.02 ng/mL         |
| Cell line                                       | IC <sub>50</sub> RITA        |
| UKF-NB-3                                        | 0.11 ± 0.04 μM               |
| UKF-NB-3 <sup>r</sup> RITA <sup>10μM</sup>      | 13.48 ± 2.35 μM              |
| Cell line                                       | IC <sub>50</sub> topotecan   |
| UKF-NB-3                                        | 2.52 ± 0.25 ng/mL            |
| UKF-NB-3 <sup>r</sup> TOPO <sup>15</sup>        | 64.92 ± 18.40 ng/mL          |
| Cell line                                       | IC <sub>50</sub> vincristine |
| UKF-NB-3                                        | 0.44 ± 0.09 ng/mL            |
| UKF-NB-3 <sup>r</sup> VCR <sup>10</sup>         | 73.32 ± 17.36 ng/mL          |
| Cell line                                       | IC <sub>50</sub> vinblastine |
| UKF-NB-3                                        | 0.20 ± 0.17 ng/mL            |
| UKF-NB-3 <sup>r</sup> VINB <sup>10</sup>        | 22.19 ± 5.48 ng/mL           |
| Cell line                                       | IC <sub>50</sub> vinorelbine |
| UKF-NB-3                                        | 1.03 ± 0.11 ng/mL            |
| UKF-NB-3 <sup>r</sup> VINOR <sup>20</sup>       | 116 ± 7 ng/mL                |
| Cell line                                       | IC <sub>50</sub> YM155       |
| UKF-NB-3                                        | 0.41 ± 0.08 nM               |
| UKF-NB-3 <sup>r</sup> YM155 <sup>50nM</sup>     | 70.80 ± 15.22 nM             |
| Cell line                                       | IC <sub>50</sub> cisplatin   |
| UKF-NB-4                                        | 729 ± 63 ng/mL               |

|                                             |                              |
|---------------------------------------------|------------------------------|
| UKF-NB-4 <sup>r</sup> CDDP <sup>1000</sup>  | 1044 ± 55 ng/mL              |
| Cell line                                   | IC <sub>50</sub> doxorubicin |
| UKF-NB-4                                    | 95.0 ± 5.1 ng/mL             |
| UKF-NB-4 <sup>r</sup> DOX <sup>350</sup>    | 1016 ± 140 ng/mL             |
| Cell line                                   | IC <sub>50</sub> vincristine |
| UKF-NB-4                                    | 6.89 ± 0.29 ng/mL            |
| UKF-NB-4 <sup>r</sup> VCR <sup>50</sup>     | 126.5 ± 4.8 ng/mL            |
| Cell line                                   | IC <sub>50</sub> carboplatin |
| UKF-NB-6                                    | 927 ± 122 ng/mL              |
| UKF-NB-6 <sup>r</sup> CARBO <sup>2000</sup> | 4560 ± 515 ng/mL             |
| Cell line                                   | IC <sub>50</sub> cisplatin   |
| UKF-NB-6                                    | 340 ± 50 ng/mL               |
| UKF-NB-6 <sup>r</sup> CDDP <sup>1000</sup>  | 3543 ± 721 ng/mL             |
| Cell line                                   | IC <sub>50</sub> dacarbazine |
| UKF-NB-6                                    | 4.38 ± 0.51 µg/mL            |
| UKF-NB-6 <sup>r</sup> DACARB <sup>8</sup>   | 35.16 ± 4.02 µg/mL           |
| Cell line                                   | IC <sub>50</sub> docetaxel   |
| UKF-NB-6                                    | 0.26 ± 0.05 ng/mL            |
| UKF-NB-6 <sup>r</sup> DOCE <sup>10</sup>    | 12.78 ± 1.52 ng/mL           |
| Cell line                                   | IC <sub>50</sub> doxorubicin |
| UKF-NB-6                                    | 6.05 ± 0.92 ng/mL            |
| UKF-NB-6 <sup>r</sup> DOX <sup>20</sup>     | 241.12 ± 52.81 ng/mL         |
| Cell line                                   | IC <sub>50</sub> etoposide   |
| UKF-NB-6                                    | 117 ± 22 ng/mL               |
| UKF-NB-6 <sup>r</sup> ETO <sup>200</sup>    | 760 ± 224 ng/mL              |
| Cell line                                   | IC <sub>50</sub> gemcitabine |
| UKF-NB-6                                    | 0.74 ± 0.22 ng/mL            |
| UKF-NB-6 <sup>r</sup> GEMCI <sup>10</sup>   | 13.77 ± 1.45 ng/mL           |
| Cell line                                   | IC <sub>50</sub> irinotecan  |
| UKF-NB-6                                    | 404.5 ± 38.4 ng/mL           |
| UKF-NB-6 <sup>r</sup> IRINO <sup>1000</sup> | 7769 ± 882 ng/mL             |
| Cell line                                   | IC <sub>50</sub> melphalan   |
| UKF-NB-6                                    | 418 ± 14 ng/mL               |
| UKF-NB-6 <sup>r</sup> MEL <sup>1000</sup>   | 1272 ± 22 ng/mL              |
| Cell line                                   | IC <sub>50</sub> oxaliplatin |
| UKF-NB-6                                    | 688.85 ± 30.62 ng/mL         |
| UKF-NB-6 <sup>r</sup> OXALI <sup>4000</sup> | 5875 ± 360 ng/mL             |

|                                             |                              |
|---------------------------------------------|------------------------------|
| Cell line                                   | IC <sub>50</sub> paclitaxel  |
| UKF-NB-6                                    | 1.03 ± 0.09 ng/mL            |
| UKF-NB-6 <sup>r</sup> PCL <sup>20</sup>     | 37.91 ± 6.47 ng/mL           |
| Cell line                                   | IC <sub>50</sub> topotecan   |
| UKF-NB-6                                    | 2.50 ± 0.51 ng/mL            |
| UKF-NB-6 <sup>r</sup> TOPO <sup>20</sup>    | 27.52 ± 3.07 ng/mL           |
| Cell line                                   | IC <sub>50</sub> vincristine |
| UKF-NB-6                                    | 1.25 ± 0.32 ng/mL            |
| UKF-NB-6 <sup>r</sup> VCR <sup>10</sup>     | 55.03 ± 5.25 ng/mL           |
| Cell line                                   | IC <sub>50</sub> vinblastine |
| UKF-NB-6                                    | 0.46 ± 0.12 ng/mL            |
| UKF-NB-6 <sup>r</sup> VINB <sup>10</sup>    | 16.15 ± 2.08 ng/mL           |
| Cell line                                   | IC <sub>50</sub> vinorelbine |
| UKF-NB-6                                    | 1.13 ± 0.12 ng/mL            |
| UKF-NB-6 <sup>r</sup> VINOR <sup>40</sup>   | 65.57 ± 14.98 ng/mL          |
| Cell line                                   | IC <sub>50</sub> YM155       |
| UKF-NB-6                                    | 0.52 ± 0.16 nM               |
| UKF-NB-6 <sup>r</sup> YM155 <sup>20nM</sup> | 123.33 ± 11.57 nM            |

**Suppl. Table S11.** Target sequences of the used siRNA pools.

CDKN1A (p21):

- CGACUGUGAUGCGCUAAUG  
- CCUAAUCCGCCACAGGAA  
- CGUCAGAACCCAUGCGGCA  
- AGACCAGCAUGACAGAUUU

BAX:

GUGCCGGAACUGAUCAGAA  
ACAUGUUUUCUGACGGCAA  
CUGAGCAGAUCAUGAAGAC  
UGGGCUGGAUCCAAGACCA

BBC3 (PUMA):

CGGACGACCUCAACGCACA  
CCGAGAUGGAGCCCAUUA  
CCUGGAGGGUCCUGUACAA  
GUAGAUACCGGAAUGAAUU

CASP9 (caspase 9):

GAGUCAGGCUCUCCUUUG  
CGGUGAAAGGGAUUUAUAA  
UCAUAGAUCUGGAGACUCG  
GCAGAAAGACCAUGGGUUU

Non targeting

UGGUUUACAUGUCGACUAA  
UGGUUUACAUGUUGUGUGA  
UGGUUUACAUGUUUUCUGA  
UGGUUUACAUGUUUCCUA
